## Genome-wide meta-analysis for Alzheimer's disease cerebrospinal fluid biomarkers

Iris E Jansen<sup>1,2,\*</sup>, Sven J van der Lee<sup>1,3,\*</sup>, Duber Gomez-Fonseca<sup>4-6,\*</sup>, Itziar de Rojas<sup>7,8,\*</sup>, Maria C Dalmaso<sup>9,10,\*</sup>, Benjamin Grenier-Boley<sup>11,12,\*</sup>, Anna Zettergren<sup>13</sup>, Aniket Mishra<sup>14</sup>, Muhammad Ali<sup>4-6</sup>, Victor Andrade<sup>9,15</sup>, Céline Bellenguez<sup>11,12</sup>, Luca Kleindam<sup>9,15,16</sup>, Fahri Küçükali<sup>17,18</sup>, Yun Ju Sung<sup>4-6</sup>, Niccolo Tesi<sup>1,3</sup>, Ellen M Vromen<sup>1</sup>, Douglas P Wightman<sup>2</sup>, Daniel Alcolea<sup>8,19</sup>, Montserrat Alegret<sup>7,8</sup>, Ignacio Alvarez<sup>20,21</sup>, Philippe Amouyel<sup>11</sup>, Lavinia A Andresen<sup>22</sup>, Shahram Bahrami<sup>22</sup>, Henri Bailly<sup>23</sup>, Olivia Belbin<sup>8,19</sup>, Sverre Bergh<sup>24,25</sup>, Geert Jan Biessels<sup>26</sup>, Kaj Blennow<sup>27,28</sup>, Rafael Blesa<sup>8,19</sup>, Mercè Boada<sup>7,8</sup>, Anne Boland<sup>29</sup>, Katharina Buerger<sup>30,31</sup>, Ángel Carracedo<sup>32,33</sup>, Laura Cervera-Carles<sup>8,19</sup>, Geneviève Chene<sup>14,34</sup>, Jorgen A.H.R. Claassen<sup>35,36</sup>, Stephanie Debette<sup>14,34,37</sup>, Jean-Francois Deleuze<sup>29</sup>, Peter Paul de Deyn<sup>38</sup>, Janine Diehl-Schmid<sup>39</sup>, Srdjan Djurovic<sup>40,41</sup>, Oriol Dols-Icardo<sup>8,19</sup>, Carole Dufouil<sup>14,42</sup>, Emmanuelle Duron<sup>23</sup>, Emrah Düzel<sup>43,44</sup>, Tormod Fladby<sup>45,46</sup>, Juan Fortea<sup>8,19</sup>, Lutz Frölich<sup>47</sup>, Pablo García-González<sup>7,8</sup>, Maria Garcia-Martinez<sup>48</sup>, Ina Giegling<sup>49</sup>, Oliver Goldhardt<sup>39</sup>, Timo Grimmer<sup>2</sup>, Annakaisa Haapasalo<sup>50</sup>, Harald Hampel<sup>51,52</sup>, Olivier Hanon<sup>23,53</sup>, Lucrezia Hausner<sup>47</sup>, Stefanie Heilmann-Heimbach<sup>54</sup>, Seppo Helisalmi<sup>55</sup>, Michael T. Heneka<sup>15,16</sup>, Isabel Hernández<sup>7,8</sup>, Sanna-Kaisa Herukka<sup>55</sup>, Henne Holstege<sup>1,3</sup>, Jonas Jarholm<sup>56</sup>, Silke Kern<sup>13,57</sup>, Anne-Brita Knapskog<sup>58</sup>, Anne M. Koivisto<sup>59-61</sup>, Johannes Kornhuber<sup>62</sup>, Teemu Kuulasmaa<sup>63</sup>, Carmen Lage<sup>48</sup>, Christoph Laske<sup>64,65</sup>, Ville Leinonen<sup>66,67</sup>, Piotr Lewczuk<sup>62,68</sup>, Alberto Lleó<sup>8,19</sup>, Adolfo López de Munain<sup>8,69-71</sup>, Sara Lopez-Garcia<sup>48</sup>, Wolfgang Maier<sup>15</sup>, Marta Marquié<sup>7,8</sup>, Merel O. Mol<sup>72</sup>, Laura Montreal<sup>7</sup>, Fermin Moreno<sup>8,69,70</sup>, Sonia Moreno-Grau<sup>7,8</sup>, Gael Nicolas<sup>73</sup>, Markus M Nöthen<sup>54</sup>, Adelina Orellana<sup>7,8</sup>, Lene Pålhaugen<sup>46</sup>, Janne Pappa<sup>74</sup>, Florence Pasquier<sup>11</sup>, Robert Perneczky<sup>30,75-77</sup>, Oliver Peters<sup>43,78</sup>, Yolande AL Pijnenburg<sup>1</sup>, Julius Popp<sup>79,80</sup>, Danielle Posthuma<sup>2</sup>, Ana Pozueta<sup>48</sup>, Josef Priller<sup>78,81,82</sup>, Raquel Puerta<sup>7</sup>, Inés Quintela<sup>32</sup>, Inez Ramakers<sup>83</sup>, Eloy Rodriguez-Rodriguez<sup>48</sup>, Dan Rujescu<sup>49</sup>, Ingvid Saltvedt<sup>84,85</sup>, Pascual Sanchez-Juan<sup>65</sup>, Philip Scheltens<sup>1</sup>, Norbert Scherbaum<sup>86</sup>, Matthias Schmid<sup>87</sup>, Anja Schneider<sup>15</sup>, Geir Selbæk<sup>25,45,58</sup>, Per Selnes<sup>46</sup>, Alexey Shadrin<sup>22</sup>, Ingmar Skoog<sup>13,25,57</sup>, Hilka Soinen<sup>59</sup>, Lluís Tàrraga<sup>7,8</sup>, Stefan Teipel<sup>88,89</sup>, Betty Tijms<sup>1</sup>, Magda Tsolaki<sup>90</sup>, Christine Van Broeckhoven<sup>18,91</sup>, Jasper Van Dongen<sup>17,18</sup>, John C. van Swieten<sup>72</sup>, Rik Vandenberghe<sup>92,93</sup>, Jean-Sébastien Vidal<sup>23</sup>, Jonathan Vogelsgang<sup>94,95</sup>, Margda Waern<sup>13,57</sup>, Michael Wagner<sup>15,16</sup>, Jens Wiltfang<sup>94,96,97</sup>, Mandy MJ Wittens<sup>18,98</sup>, Henrik Zetterberg<sup>27,28,99-101</sup>, Miren Zulaica<sup>8,69,70</sup>, Gra@ce, EADB, Cornelia M. van Duijn<sup>72,102</sup>, Maria Bjerke<sup>18,98,103</sup>, Sebastiaan Engelborghs<sup>18,98,104</sup>, Frank Jessen<sup>16,105,106</sup>, Charlotte E Teunissen<sup>107</sup>, Pau Pastor<sup>20,21</sup>, Mikko Hiltunen<sup>108</sup>, Martin Ingelsson<sup>109-111</sup>, Ole Andreassen<sup>22</sup>, Jordi Clarimón<sup>8,19</sup>, Kristel Sleegers<sup>17,18</sup>, Agustín Ruiz<sup>7,8,\*\*</sup>, Alfredo Ramirez<sup>15,16,49,106,112,\*\*</sup>, Carlos Cruchaga<sup>4-6,\*\*</sup>, Jean-Charles Lambert<sup>11,\*\*</sup>, Wiesje M van der Flier<sup>1,\*\*</sup>

\* Co-first author

\*\* Co-last author

Corresponding author: Iris E Jansen, [i.e.jansen@vu.nl](mailto:i.e.jansen@vu.nl), 0031 20 5985737.

1. Alzheimer Center Amsterdam, Department of Neurology, Amsterdam Neuroscience, Vrije Universiteit Amsterdam, Amsterdam UMC, Amsterdam, The Netherlands.
2. Department of Complex Trait Genetics, Center for Neurogenomics and Cognitive Research, Amsterdam Neuroscience, VU Amsterdam, Amsterdam, the Netherlands.
3. Section Genomics of neurodegenerative Diseases and Aging, Department of Clinical Genetics, VU University Medical Centre, Amsterdam, The Netherlands.
4. Department of Psychiatry, Washington University School of Medicine, St Louis, MO, USA.
5. NeuroGenomics and Informatics, Washington University School of Medicine, St Louis, MO, USA.
6. Hope Center for Neurological Disorders, Washington University School of Medicine, St Louis, MO, USA.
7. Research Center and Memory Clinic. Ace Alzheimer Center Barcelona – Universitat Internacional de Catalunya, Spain.

NOTE: This preprint reports new research that has not been certified by peer review and should not be used to guide clinical practice.

8. CIBERNED, Network Center for Biomedical Research in Neurodegenerative Diseases, National Institute of Health Carlos III, Madrid, Spain.
9. Division of Neurogenetics and Molecular Psychiatry, Department of Psychiatry and Psychotherapy, Faculty of Medicine and University Hospital Cologne, University of Cologne, Cologne, Germany.
10. Estudios en Neurociencias y Sistemas Complejos (ENYS-CONICET), Hospital El Cruce, Universidad Nacional A. Jauretche, Florencio Varela, Argentina.
11. Univ. Lille, Inserm, CHU Lille, Institut Pasteur de Lille, U1167-RID-AGE - Facteurs de risque et déterminants moléculaires 99 des maladies liés au vieillissement, France.
12. Institut Pasteur de Lille, 1 rue du Professeur Calmette, BP 245 - 59019 LILLE cedex, France.
13. Neuropsychiatric Epidemiology Unit, Department of Psychiatry and Neurochemistry, Institute of Neuroscience and Physiology, the Sahlgrenska Academy, Centre for Ageing and Health (AGECAP) at the University of Gothenburg, Sweden.
14. University of Bordeaux, Inserm, Bordeaux Population Health Research Center, team VINTAGE, UMR 1219, F-33000 Bordeaux, France.
15. Department of Neurodegenerative Diseases and Geriatric Psychiatry, University Hospital Bonn, Medical Faculty, Bonn, Germany.
16. German Center for Neurodegenerative Diseases (DZNE), Bonn, Germany.
17. Complex Genetics of Alzheimer's Disease Group, VIB Center for Molecular Neurology, VIB, Antwerp, Belgium.
18. Department of Biomedical Sciences, University of Antwerp, Antwerp, Belgium.
19. Sant Pau Memory Unit, Department of Neurology, Institut d'Investigacions Biomèdiques Sant Pau - Hospital de Sant Pau, Universitat Autònoma de Barcelona, Barcelona, Spain.
20. Memory Disorders Unit, Department of Neurology, Hospital Universitari Mutua de Terrassa, Terrassa, Spain.
21. Fundació per a la Recerca Biomèdica i Social Mútua de Terrassa, Terrassa, Spain.
22. NORMENT Centre, Institute of Clinical Medicine, University of Oslo and Division of Mental Health and Addiction, Oslo University Hospital, 0407 Oslo, Norway.
23. Université de Paris, EA 4468, APHP, Hôpital Broca, Paris, France.
24. The Research-centre for Age-related Functional Decline and Disease, Innlandet Hospital Trust, Brumunddal, Norway.
25. Norwegian National Centre for Ageing and Health, Vestfold Hospital Trust, Tønsberg, Norway.
26. Department of Neurology, UMC Utrecht Brain Center, Utrecht, the Netherlands.
27. Department of Psychiatry and Neurochemistry, Institute of Neuroscience and Physiology, the Sahlgrenska Academy at the University of Gothenburg, Mölndal, Sweden.
28. Clinical Neurochemistry Laboratory, Sahlgrenska University Hospital, Mölndal, Sweden.
29. Université Paris-Saclay, CEA, Centre National de Recherche en Génomique Humaine, 91057, Evry, France.
30. German Center for Neurodegenerative Diseases (DZNE, Munich), Munich, Germany.
31. Institute for Stroke and Dementia Research (ISD), University Hospital, LMU Munich, Munich, Germany.
32. Grupo de Medicina Xenómica, Centro Nacional de Genotipado (CEGEN-PRB3-ISCI). Universidade de Santiago de Compostela, Santiago de Compostela, Spain.
33. Fundación Pública Galega de Medicina Xenómica- CIBERER-IDIS, Santiago de Compostela, Spain.
34. CHU de Bordeaux, Department of Neurology, F-33000 Bordeaux, France.
35. Radboudumc Alzheimer Center, Department of Geriatrics, Radboud University Medical Center, Nijmegen, the Netherlands.
36. Donders Center for Medical Neuroscience, Nijmegen, The Netherlands.
37. Department of Neurology, Boston University School of Medicine, Boston, MA 2115, USA.
38. Department of Neurology, University Medical Center Groningen, the Netherlands.
39. Center for Cognitive Disorders, Department of Psychiatry and Psychotherapy, Technical University of Munich, School of Medicine, Munich, Germany.
40. Department of Medical Genetics, Oslo University Hospital, Oslo, Norway.
41. NORMENT Centre, Department of Clinical Science, University of Bergen, Bergen, Norway.

42. Pôle de Santé Publique Centre Hospitalier Universitaire (CHU) de Bordeaux, Bordeaux, France.
43. German Center for Neurodegenerative Diseases (DZNE), Magdeburg, Germany.
44. Institute of Cognitive Neurology and Dementia Research (IKND), Otto-von-Guericke University, Magdeburg, Germany.
45. Institute of Clinical Medicine, University of Oslo.
46. Department of Neurology, Akershus University Hospital.
47. Department of Geriatric Psychiatry, Central Institute of Mental Health; Medical Faculty Mannheim, University of Heidelberg.
48. Cognitive Impairment Unit, Neurology Service and Centro de Investigación Biomédica en Red sobre Enfermedades Neurodegenerativas (CIBERNED), 'Marqués de Valdecilla' University Hospital, Institute for Research 'Marqués de Valdecilla' (IDIVAL), University of Cantabria, Santander, Spain.
49. Division of General Psychiatry, Dept. of Psychiatry and Psychotherapy, Medical University of Vienna, Vienna, Austria.
50. A.I. Virtanen Institute for Molecular Sciences, University of Eastern Finland, Kuopio, Finland.
51. Sorbonne University, Alzheimer Precision Medicine (APM), AP-HP, Pitié-Salpêtrière Hospital, Paris, France.
52. Eisai Inc., Neurology Business Group, 100 Tice Blvd, Woodcliff Lake, NJ 07677, USA.
53. APHP, Hopital Broca, Memory Resource and Research Centre of de Paris-Broca-Ile de France.
54. Institute of Human Genetics; University of Bonn, School of Medicine & University Hospital Bonn, 53127 Bonn, Germany.
55. Institute of Clinical Medicine, Internal Medicine, University of Eastern Finland, Kuopio, Finland.
56. Department of Neurology, Akershus University Hospital, Lorenskog, Norway.
57. Region Västra Götaland, Sahlgrenska University Hospital, Psychiatry, Cognition and Old Age Psychiatry Clinic, Gothenburg, Sweden.
58. Department of Geriatric Medicine, Oslo University Hospital, Oslo, Norway.
59. Department of Neurology, Institute of Clinical Medicine, University of Eastern Finland, Kuopio, Finland.
60. Department of Neurology, Kuopio University Hospital, Kuopio, Finland.
61. Department of Neurology, Helsinki University Hospital, Helsinki, Finland.
62. Department of Psychiatry and Psychotherapy, Universitätsklinikum Erlangen, and Friedrich-Alexander Universität Erlangen-Nürnberg, Erlangen, Germany.
63. Bioinformatics Center, Institute of Biomedicine, University of Eastern Finland, Kuopio, Finland.
64. German Center for Neurodegenerative Diseases (DZNE), Tübingen, Germany.
65. Section for Dementia Research, Hertie Institute for Clinical Brain Research and Department of Psychiatry and Psychotherapy, University of Tübingen, Tübingen, Germany.
66. Institute of Clinical Medicine, Neurosurgery, University of Eastern Finland, Kuopio, Finland.
67. Department of Neurosurgery, Kuopio University Hospital, Kuopio, Finland.
68. Department of Neurodegeneration Diagnostics, Medical University of Białystok, Białystok, Poland.
69. Hospital Universitario Donostia-OSAKIDETZA.
70. Instituto Biodonostia.
71. University of The Basque Country.
72. Department of Neurology, ErasmusMC, The Netherlands.
73. Normandie Univ, UNIROUEN, Inserm U1245 and CHU Rouen, Department of Genetics and CNR-MAJ, Rouen, France.
74. Department of Neurology and Alzheimer Center Erasmus MC, Erasmus MC University Medical Center, Rotterdam, the Netherlands.
75. Department of Psychiatry and Psychotherapy, University Hospital, LMU Munich, Munich, Germany.
76. Munich Cluster for Systems Neurology (SyNergy) Munich, Munich, Germany.
77. Ageing Epidemiology Research Unit, School of Public Health, Imperial College London, London, UK.
78. German Center for Neurodegenerative Diseases (DZNE), Berlin, Germany.

79. Department of Geriatric Psychiatry, University Hospital of Psychiatry Zürich and University of Zürich, Zürich, Switzerland.
80. Old age Psychiatry, Department of Psychiatry, University Hospital of Lausanne, Lausanne, Switzerland.
81. Department of Psychiatry and Psychotherapy, Charité, Charitéplatz 1, 10117 Berlin, Germany.
82. Department of Psychiatry and Psychotherapy, Klinikum rechts der Isar, Technical University Munich, 81675 Munich.
83. Maastricht University, Department of Psychiatry & Neuropsychologie, Alzheimer Center Limburg, Maastricht, the Netherlands.
84. Department of neuromedicine and movement science, Norwegian university of science and technology (NTNU), Trondheim, Norway.
85. Department of geriatrics, St Olav hospital, University hospital of Trondheim, Norway.
86. LVR-Hospital Essen, Department of Psychiatry and Psychotherapy, Medical Faculty, University of Duisburg-Essen, Essen, Germany.
87. Institute of Medical Biometry, Informatics and Epidemiology, University Hospital of Bonn, Bonn, Germany.
88. German Center for Neurodegenerative Diseases (DZNE), Rostock, Germany.
89. Department of Psychosomatic Medicine, Rostock University Medical Center, Gehlsheimer Str. 20, 18147 Rostock.
90. 1st Department of Neurology, School of Medicine, Faculty of Health Sciences, Aristotle University of Thessaloniki, Makedonia, Greece.
91. Neurodegenerative Brain Diseases Group, VIB Center for Molecular Neurology, VIB, Antwerp, Belgium.
92. Neurology, University Hospitals Leuven.
93. Laboratory for Cognitive Neurology, Department of Neurosciences, Leuven, Belgium.
94. Department of Psychiatry and Psychotherapy, University Medical Center Goettingen, Goettingen, German.
95. Department of Psychiatry, Harvard Medical School, McLean Hospital, Belmont, MA, USA.
96. German Center for Neurodegenerative Diseases (DZNE), Goettingen, Germany.
97. Medical Science Department, iBiMED, Aveiro, Portugal.
98. Center for Neurosciences (C4N), Vrije Universiteit Brussel, Brussels, Belgium.
99. Department of Neurodegenerative Disease, UCL Institute of Neurology, London, United Kingdom.
100. UK Dementia Research Institute at UCL, London, United Kingdom.
101. Hong Kong Center for Neurodegenerative Diseases, Hong Kong, China.
102. Nuffield Department of Population Health Oxford University.
103. Laboratory of Neurochemistry, Universitair Ziekenhuis Brussel, Brussels, Belgium.
104. Department of Neurology, Universitair Ziekenhuis Brussel, Brussels, Belgium.
105. Department of Psychiatry and Psychotherapy, Faculty of Medicine and University Hospital Cologne, University of Cologne, Cologne, Germany.
106. Cluster of Excellence Cellular Stress Responses in Aging-associated Diseases (CECAD), University of Cologne.
107. Neurochemistry Lab, Department of Clinical Chemistry, Amsterdam Neuroscience, Vrije Universiteit Amsterdam, Amsterdam UMC, Amsterdam, The Netherlands.
108. Institute of Biomedicine, University of Eastern Finland, Kuopio, Finland.
109. Department of Public Health and Caring Sciences, Molecular Geriatrics, Rudbeck Laboratory, Uppsala University, Uppsala, Sweden.
110. Krembil Brain Institute, University Health Network, Toronto, Canada.
111. Dept. of Medicine and Tanz Centre for Research in Neurodegenerative Diseases, University of Toronto, Canada.
112. Department of Psychiatry & Glenn Biggs Institute for Alzheimer's and Neurodegenerative Diseases, San Antonio, TX, USA.

## Abstract

Amyloid-beta 42 (A $\beta$ 42) and phosphorylated tau (pTau) levels in cerebrospinal fluid (CSF) reflect core features of the pathogenesis of Alzheimer's disease (AD) more directly than clinical diagnosis.

Initiated by the European Alzheimer & Dementia Biobank (EADB), the largest collaborative effort on genetics underlying CSF biomarkers was established, including 31 cohorts with a total of 13,116 individuals (discovery  $n = 8,074$ ; replication  $n = 5,042$  individuals). Besides the *APOE* locus, novel associations with two other well-established AD risk loci were observed; *CR1* was shown a locus for amyloid beta 42 (A $\beta$ 42) and *BIN1* for phosphorylated Tau (pTau). *GMNC* and *C16orf95* were further identified as loci for pTau, of which the latter is novel. Clustering methods exploring the influence of all known AD risk loci on the CSF protein levels, revealed 4 biological categories (amyloid, astrocyte, processing & migration, and migration & motility) suggesting multiple A $\beta$ 42 and pTau related biological pathways involved in the etiology of AD. In functional follow-up analyses, *GMNC* and *C16orf95* both associated with lateral ventricular volume, implying an overlap in genetic etiology for tau levels and brain ventricular volume.

## Keywords:

GWAS, Alzheimer's disease, cerebrospinal fluid, amyloid-beta, tau.

## Introduction

Resolving the genetic background of Alzheimer's disease (AD) has proven to contribute greatly to our understanding of underlying disease processes, for instance with the discovery of *APP* [1], *PSEN1* [2], and *PSEN2* [3] in family-based studies, leading to the amyloid cascade theory [4]. In addition, genome-wide association studies (GWAS) in AD have convincingly highlighted the importance of microglia [5, 6], a finding previously supported by research from other scientific fields [7-9], and now also widely accepted as a genetic cause rather than a result of AD pathogenesis. Further exploration of genetic risk factors contributing to AD development and pathogenesis might reveal more biological insights, an important step in the quest for AD treatment that will slow down or even halt disease progression.

GWAS of clinically diagnosed AD patients have been successful, and current efforts largely focus on increasing sample size to improve the statistical power to detect genetic variants [10, 11]. An alternative approach is to study effects of genetic variants on pathophysiological features of AD. The strength of such studies is based on the assumption that more objective measurable biological properties are more strongly associated to the underlying AD pathology than the clinical diagnostic

classifications (e.g. misclassifications or symptoms not manifested yet), thereby allowing to detect larger effects by reducing heterogeneity [12]. The use of biomarkers further enables to identify genetic effects specific for certain AD-related biological mechanisms. This is an advantage over the conventional GWAS approach for clinical AD diagnosis, where it generally remains unclear through what causal gene or cellular process a locus is associated to AD.

It is possible to measure levels of amyloid-beta-42 (A $\beta$ 42) and (phosphorylated) tau (pTau and Tau) in cerebrospinal fluid (CSF), the two major proteins implicated in the AD pathological process. A $\beta$ 42 pathology in the brain is negatively correlated with CSF A $\beta$ 42 levels, where a decrease in CSF A $\beta$ 42 is indicative of AD [13, 14]. CSF (p)Tau is positively correlated with (p)Tau pathology in the brain, and therefore higher CSF (p)Tau levels are observed in patients with AD. CSF pTau is presumed to reflect AD-type tau-tangles more specifically than total tau [13, 14]. Previous studies on CSF amyloid beta and (p)Tau have identified genetic risk loci, the most recent one including 3,146 individuals [15]. Some of the 8 discovered loci had not been previously associated to AD, emphasizing the potential of endophenotypes to reveal novel genetic risk factors. Our current study aimed to further define the genetic background of AD by studying the genetic effects on CSF A $\beta$ 42 and pTau levels in a total of 13,116 individuals.

## **Materials and methods**

### *Participants*

We combined data from 16 European cohorts, encompassing a total of 8,074 individuals (Table 1, Supplementary Table 1, Supplementary Figure 1) with both genotype data and CSF measurements. The majority of these cohorts (82%) are part of the EADB consortium [10], and included the full spectrum of clinical severity potentially leading to AD, from subjective cognitive decline, mild cognitive impairment, to dementia. Written informed consent was obtained from study participants or, for those with substantial cognitive impairment, from a caregiver, legal guardian, or other proxy. Study protocols for all cohorts were reviewed and approved by the appropriate institutional review boards.

For replication, 15 cohorts totaling 5,042 individuals (Supplementary Table 2) were available to attempt replication of the association signals to A $\beta$ 42 and pTau, for the variants with p-value < 1e-5 in the discovery analysis. Data from all cohorts, except one (NorCog from University of Oslo, Norway), were obtained through collaboration with the previous largest GWAS on CSF A $\beta$ 42 and pTau, mostly including cohorts originating from the United States [15]. Basic demographics are described in Supplementary Table 2, more detailed cohort information is described elsewhere [15].

### *CSF measurements*

Due to the multi-center approach, CSF protein levels were measured with various CSF protein assays (Supplementary Table 2). A $\beta$ 42 was measured with ELISA, Lumipulse or V-PLEX, and pTau with ELISA or Lumipulse. For details on specific lab procedures, see the original studies [15-29]. Protein levels were log<sub>10</sub> transformed and normalized within cohorts and CSF assay type (if multiple assays were used within a single cohort) to approximate a normal distribution to correct for the application of various CSF assays across different studies. Then, the normalized protein levels were used as continuous phenotypes in the association analyses. For the stratified analyses, two subgroups of individuals, amyloid normal and amyloid abnormal, were defined based on their A $\beta$ 42 status. Individuals with an untransformed A $\beta$ 42 level below a threshold were assigned to the abnormal amyloid level group. The thresholds were defined by the individual research groups as it depends on technical circumstances, and are displayed in Supplementary Table 2.

### *Genotyping, quality control and imputation*

The genetic data for the EADB cohorts has been processed in a homogeneous approach (Supplementary Table 1), in which the Illumina Infinium Global Screening Array (GSA, GSASharedCUSTOM\_24+v1.0) was predominantly used for data generation. Additional arrays included the Axiom 815K Spanish biobank array (Thermo Fisher) for ACE (Barcelona, Spain) and Valdecilla (Santander, Spain) cohorts, and the Illumina Neurochip array (Gothenburg, Sweden). Standard quality control (QC) procedures were performed to exclude individuals and variants with low quality, in general followed by imputation with the Trans-Omics for Precision Medicine (TOPMed) reference panel [30, 31]. For the EADB cohorts for which GSA genotype level data was available, the details on QC steps and imputation with the TOPMed reference panel were previously described [10].

For the Spanish ACE and Valdecilla cohorts, QC procedures are described in another study [32], followed by imputation with the TOPMed reference panel. For the Gothenburg H70 Birth Cohort studies and clinical AD samples from Sweden, the QC and imputation procedures were described elsewhere [33]. Post-imputation QC only included variants with a high imputation quality (RSQ [imputation quality] >0.8). The UCSC LiftOver program (<https://genome-store.ucsc.edu/>) and Plink v2.0 ([www.cog-genomics.org/plink/2.0/](http://www.cog-genomics.org/plink/2.0/)) [34] were used to lift the GRCh37 genomic positions to GRCh38, the genomic build for all other datasets. All genotypes were hard called using the default Plink v2.0 ([www.cog-genomics.org/plink/2.0/](http://www.cog-genomics.org/plink/2.0/)) settings.

### *Heritability and genetic correlation*

For the estimation of the SNP-heritability, two distinct tools were used. With LD score regression (LDSC) it was possible to perform the calculations with the full number of samples as the input for this analysis are the summary statistics. Besides heritability estimates, genetic correlations were also calculated for A $\beta$ 42, pTau, tau (to test the similarity in genetic background to pTau), and two previously published AD summary statistics [5, 35]. Precalculated LD scores from the 1,000 Genomes European reference population were obtained online. All estimates were based on HapMap3 SNPs only to ensure high-quality LD score calculations (<https://alkesgroup.broadinstitute.org/LDSCORE/>). As a rule of thumb, LD Score regression tends to yield very noisy results when applied to datasets with fewer than 5000 individuals (<https://github.com/bulik/ldsc/wiki/FAQ>) [36]. The summary statistics for the stratified analyses were therefore not considered.

For comparison to SNP-heritability estimates of previous studies for A $\beta$ 42 and pTau, GCTA v1.9 [37] was applied to the individual-level genotype data of the largest dataset (Netherlands). Other datasets were not considered as the sample size was too low for small standard errors, thereby impossible to draw any meaningful conclusions from the estimates. The restricted maximum likelihood (REML) analysis was performed for the log<sub>10</sub>-transformed normalized CSF A $\beta$ 42 and pTau adjusted for gender, age, and the first 10 principal components. Variance explained could not be calculated for significant loci only as p-values from GWAS results of a large independent sample are unavailable, and calculation in the Amsterdam sample would be hampered by winners-curse, causing inflation.

### *Single-marker association analysis*

Genome-wide association analysis for each cohort was performed in PLINK v2.0 [34], using linear regression for the continuous phenotypes A $\beta$ 42, tau and pTau. Association tests were adjusted for gender, age, assay type (if applicable), and ten ancestry principal components. Only variants with a minor allele frequency threshold above 0.01 were tested. For smaller cohorts ( $n < 250$  individuals) this threshold was set to 0.05 to avoid false positive findings.

Association analyses were repeated for subgroups, stratified according to *APOE4* status (based on the high-quality ( $R^2 > 0.8$ ) imputed variants rs429358 and rs7412) or dichotomous A $\beta$ 42 status, resulting in the following groups: 1) *APOE4* (hetero- and homozygous) carriers; 2) *APOE4* non-carriers; 3) individuals with abnormal A $\beta$ 42 levels; and 4) individuals with normal A $\beta$ 42 levels. After stratification, cohorts with a minimal sample size of 100 individuals were included. Covariates were those described for the main analyses above.



### *Independent replication analysis*

A total of 5,042 samples from 15 cohorts were included for the replication analysis. The genetic data for NorCog were generated with 2 different genotyping assays. Extensive QC procedures which are detailed elsewhere [10], allowed for joined genetic analyses of these sub-datasets. Variant association testing was performed according to the association analysis section above. For all other replication cohorts, QC, imputation and association testing procedures are described elsewhere [15]. In short, individual and variant QC standards were met, and imputation was performed using the 1000 Genomes Project Phase 3 reference panel. Each dataset was QCed and imputed independently. The additive linear regression model in PLINK v1.9 [34] was used for single-variant analyses.

### *Meta-analyses*

METAL [38] was used for meta-analyses in stage 1 to 3 of the per cohort association results, applying the default approach that utilizes p-value and direction of effect, while weighted according to sample size. For stage 1, we used the genome-wide threshold for significance of  $P < 5 \times 10^{-8}$ , and a suggestive threshold of  $P < 1 \times 10^{-5}$  to select variants to study in Stage 2. Stage 2 variants were considered a replication with  $P < 0.05$  and same direction of effect in comparison to stage 1. The genome-wide threshold for significance of  $P < 5 \times 10^{-8}$  was used to defined GWAS hits in stage 3.

### *Colocalization*

All variants within 1.5 megabases (Mb) of the lead variant of each genomic risk loci were used in the colocalization analysis. The GWAS data and eQTL data were trimmed so that all variants overlap. Colocalization was performed per gene using coloc.abf from the Coloc R package [39]. Default priors were used for prior probability of association with the GWAS data and eQTL data. The prior probability of colocalization was set as  $1 \times 10^{-6}$  as recommended [40]. Nominal P, sample size and MAF from the GWAS data and eQTL data were used in all the colocalization analyses. Colocalizations with a posterior probability  $> 0.8$  were considered successful colocalizations. eQTL data from all tissues except microglia were obtained from the eQTL catalog [41]. The microglia data were obtained from Young et al. [42]. GWAS summary statistics for loci comparison to other GWAS studies were obtained from Kunkle et al. [35] for AD, and from Vojinovic et al. [43] for brain ventricular volume.

### *Gene-based analysis*

Gene-based and gene-set association tests were performed using MAGMA v1.08 [44], which was implemented by FUMA [45]. The per variant association summary statistics for the main results

served as the input, where variants were selected if mapped within 18,870 protein coding genes (with unique ensembl ID). The mean SNP-wise model was implemented. The Bonferroni-corrected significance threshold was set to  $p < 2.65 \times 10^{-6}$ , based on the number of tested genes.

### *Gene mapping*

The genome-wide significant loci of the main results were further explored for promising causal AD genes using FUMA [45], after lifting over the results with genomic build GRCh38 to GRCh37 with the UCSC LiftOver Program (<https://genome-store.ucsc.edu/>). Two gene mapping strategies were used:

- Positional mapping maps SNPs to genes based on physical distance (within a 10-kb window) from known protein-coding genes in the human reference assembly (GRCh37/hg19).
- eQTL mapping maps SNPs to genes with which they show a significant eQTL association (that is, allelic variation at the SNP is associated with the expression level of that gene). eQTL mapping uses information from 85 brain- and immune-related tissue types in 11 data repositories (BIOSQTL, BloodeQTL, BRAINEAC, CMC, DICE, eQTLcatalogue, eQTLGen, GTEx, PsychENCODE, scRNA\_eQTLs, xQTLServer), and is based on cis-eQTLs which can map SNPs to genes up to 1 Mb apart. We used a false discovery rate of 0.05 to define significant eQTL associations.

### *Phenome-wide association studies (PheWAS)*

We conducted phenome-wide association studies (PheWAS) on the top SNPs, rs4844610, rs429358, rs744373, rs9877502, rs4843559. A PheWAS starts out with a single to a few variants of interest that are systematically being tested for association to many phenotypes. We used the 'phewas' function of the R-package 'ieugwasr' [46, 47]. Using this function, we searched traits that associate with the list of SNPs with  $P < 1 \times 10^{-7}$  in all GWAS harmonized summary statistics in the MRC IEU OpenGWAS data infrastructure [47]. In short, this enables us to screen for other traits to which these SNPs are associated. The database (May 2021) includes the GWAS summary statistics of 19,649 traits.

### *Association with CSF proteomics*

We associated the lead variants near *GMNC* (rs9877502) and in *C16orf95* (rs4843559) with CSF proteomics data of two different sources (EMIF-AD MBD and Knight-ADRC). For the EMIF-AD MBD data, a total of 2,136 proteins were quantified centrally using 11-plex tandem mass tag spectrometry in 366 individuals from the EMIF-AD MBD study [48] (subset of Amsterdam Dementia Cohort within EADB). We selected proteins with a maximum of 50% missing values. For related proteins that had

identical values due to fragment aspecificity, we randomly selected one protein for analysis (52 proteins were excluded). Out of the 2,136 proteins quantified, 1,282 (55.4%) proteins respected these criteria and were included in the study.

For the Knight-ADRC data, levels of 1,305 proteins were quantified using the SOMAscan assay, a multiplexed, aptamer-based platform CSF (n = 717) [49]. Quality control was performed at the sample and aptamer levels using control aptamers (positive and negative controls) and calibrator samples. As described in detail [49], additional quality control was performed that included limit of detection cut-off, scale factor, coefficient of variation, and outlier variation. Only proteins with a call rate higher than 85% call rate were included. A total of 713 proteins passed quality control. pQTL analyses was performed and reported in previous studies [49].

g:Profiler and Enrichment map [50], a Cytoscape App, were used to perform pathway enrichment analyses on proteins with a certain level of association (EMIF-AD MBD:  $P < 0.05$ ; Knight-ADRC:  $P < 0.004$ , corresponding to proteins with a similar effect size as in EMIF-AD MBD). The results are shown as functionally grouped networks. We used GO biological processes and Reactome as ontology sources. For this explorative analysis, only pathways with  $P < 0.05$  (corrected for multiple testing) are shown.

#### *Effects of AD-associated variants on A $\beta$ 42 and pTau*

We assessed the most recent GWAS [10] for AD and extracted the top loci of 83 variants (excluding *APOE*  $\epsilon$ 4 and *APOE*  $\epsilon$ 2) that showed genome-wide significant association with AD [10]. We extracted Z-scores and p-values and plotted them in a heatmap. Rows and columns were clustered using Euclidean distances and average hierarchical clustering. We performed a gene-set enrichment analysis to find molecular pathways enriched within each cluster. The SNP-gene assignment corresponds to the one described in the recent main EADB GWAS [10], including several annotation strategies. When multiple genes were reported to associate with the same SNP (rs12590654 near *SLC24A4/RIN3*, rs7225151 near *SCIMP/RABEP1*, rs6846529 near *CLNK/HS3ST1*, rs7384878 near *ZCWPW1/NYAP1* and rs10437655 near *CELF1/SPI1*), we considered both genes for the gene-set enrichment analysis. In addition, for SNP rs6605556, located in the complex HLA region, we considered HLA-DRB1 gene (eQTL in blood with rs6605556), and for SNPs rs7157106 and rs10131280, both located in the gene-dense IGH region, we considered IGHG2 and IGHV2-70 (eQTLs in blood with rs7157106 and rs10131280, respectively). The gene-set enrichment analysis was performed specifying Biological Processes from Gene Ontology [51, 52] as gene-set and correcting p-values with Bonferroni. Biological pathways were considered significant at corrected  $p < 0.05$ . To help with the interpretation of each cluster's function, we plot the most recurring words of the significant

terms underlying each cluster using wordclouds. The following R packages were used for these analysis: gprofiler2 [53] and wordcloud2 (<https://github.com/lchiffon/wordcloud2>).

## Results

The overview of the study design is illustrated in Supplementary Figure 1. The GWA results from 16 studies were combined in stage 1. Variants that reached a suggestive level of significance ( $p < 1 \times 10^{-5}$ ) were subsequently evaluated in an independent sample from 15 studies in stage 2. Finally, the results of stage 1 and stage 2 analyses were combined in stage 3. Detailed information on study participants, CSF acquisition and genotyping is provided in Table 1 and Supplementary Table 1 and 2. The results for tau and pTau are strongly correlated ( $r_g = 0.94$ ;  $p = 1.86 \times 10^{-118}$ ), and therefore only pTau findings are reported.

### *Genetic architecture*

The fraction of variance in A $\beta$ 42 and pTau protein levels that could be explained by the additive effect of the genetic variants tested, was estimated on 0.13 (SE=0.06) and 0.21 (SE=0.07) by LDSC, respectively. These SNP-heritabilities are substantially higher than the 0.07 previously estimated with LDSC for the diagnosis AD [54], or similarly reported for AD by this study using the same LDSC method on more recent public GWAS summary statistics of AD [5, 35] (Supplementary Table 3). GCTA estimated the SNP-heritability to be higher for both A $\beta$ 42 and pTau, namely 0.27 (SE=0.13) and 0.34 (SE=0.12), respectively. Both methods are reporting a higher SNP-heritability for pTau than for A $\beta$ 42. Genetic correlation estimates with AD GWAS summary statistics are described in the Supplementary Results and Supplementary Table 4.

### *GWAS variants associated with CSF A $\beta$ 42 and pTau*

The stage 1 meta-analyses (QQ plots and lambda shown in Supplementary Figure 2) identified 4 independent significant variant associations, 1 for A $\beta$ 42 and 3 for pTau (Table 2). The strongest associations were observed for both A $\beta$ 42 and pTau in the *APOE* locus (Table 2). The variant that determines the *APOE*  $\epsilon$ 4 allele (rs429358-C) decreased A $\beta$ 42 ( $Z = -36.29$ ;  $p = 2.0 \times 10^{-288}$ ) and increased pTau ( $Z = 18.31$ ;  $p = 6.87 \times 10^{-75}$ ) in CSF. In contrast, the variant determining the *APOE*  $\epsilon$ 2 haplotype (rs7412-T) increased A $\beta$ 42 ( $Z = 11.97$ ;  $p = 5.09 \times 10^{-33}$ ) and decreased pTau ( $Z = -6.59$ ;  $p = 4.49 \times 10^{-11}$ ). The *APOE*  $\epsilon$ 2 association was replicated in stage 2 (A $\beta$ 42:  $Z = 7.27$ ;  $p = 3.73 \times 10^{-13}$ , and pTau:  $Z = -6.43$ ;  $p = 1.26 \times 10^{-10}$ ), and *APOE*  $\epsilon$ 4 with rs4420638-G for A $\beta$ 42 ( $Z = -25.51$ ;  $p = 1.57 \times 10^{-143}$ ), and with rs769449-A for pTau ( $Z = 13.83$ ;  $p = 1.66 \times 10^{-43}$ ), both variants in high linkage disequilibrium with rs429358, as the original *APOE*  $\epsilon$ 4 variant was not genotyped or imputed in the replication datasets.

In stage 1, no other significant loci were observed for A $\beta$ 42. For pTau, we further identified significant associations mapping to two chromosomal regions at 3q28 and 16q24.2 (Figure 2, Table 2). The 3q28 locus ( $Z=9.06$ ;  $p=1.28 \times 10^{-19}$ ) also known as the *GMNC* locus, was reported previously for its association with pTau [15]. The cohorts from this previous study are the replication cohorts of the current study, thereby logically *GMNC* was replicated ( $Z=8.97$ ;  $p=3.00 \times 10^{-19}$ ). The 16q24.2 locus ( $Z=6.41$ ;  $p=1.49 \times 10^{-10}$ ), which is novel for pTau, was replicated in the stage 2 meta-analysis ( $Z=3.88$ ;  $p=1.03 \times 10^{-04}$ ).

Subsequently, the results from all individual studies were combined in the stage 3 meta-analysis ( $N=13,116$ ). In stage 3, two well-known AD loci showed additional genome-wide significant associations (Figure 1, Table 2) with A $\beta$ 42 in chromosomal region 1q32.2 ( $Z=-6.01$ ;  $p=1.84 \times 10^{-9}$ , *CR1*), and with pTau for the region 2q14.3 ( $Z=6.15$ ;  $p=7.88 \times 10^{-10}$ , *BIN1*). The per-cohort and zoomed in genomic location details of all significantly associated loci of stage 3 are visualized in Supplementary Figures 3 to 8. Colocalization analyses (results detailed in Supplementary Table 5) showed colocalization (posterior probability = 0.85) of the *CR1*-locus to the *CR1*-locus of a recent AD GWAS [35]. The *BIN1*-locus did not colocalize (posterior probability = 0.01), thereby suggesting that other causal variants are underlying the association signal (posterior probability = 0.99).

Explorative meta-analyses were repeated stratified for *APOE* (*APOE*  $\epsilon 4$  carriers ( $n=3,240$ ) vs. *APOE*  $\epsilon 4$  non-carriers ( $n=3,201$ )) and amyloid status (Amyloid normal levels ( $n=3,182$ ) vs. amyloid abnormal levels ( $n=3,775$ )) for stage 1 (QQ plots and lambda shown in Supplementary Figure 9 and 10), of which the results are visualized in Supplementary Figures 11 and 12, and detailed in Supplementary Results and Supplementary Table 6. Besides the *APOE* and *GMNC* loci, two novel loci are observed that have previously not been linked to any AD phenotype.

### *Functional interpretation*

To interpret the functional effects of the identified variants beyond AD, we performed gene prioritization (based on positional mapping, gene-based association results, and brain and immune eQTL annotations) using FUMA [45], colocalization analyses and PheWAS. The results of the FUMA annotation are detailed in the Supplementary Results and Supplementary Table 7. None of our CSF A $\beta$ 42 and pTau loci colocalized with any of the brain or immune eQTLs from the 41 tested datasets.

For the PheWAS, using data from publicly available genome-wide association studies ( $N=19,649$ ) of the five top variants yielded 529 associations at  $p < 1 \times 10^{-7}$  (Supplementary Table 8). The majority is the known wide range of 490 traits associations with the *APOE*  $\epsilon 4$  allele. For the other variants 39 associations were reported for 27 unique traits. These traits can be categorized in three groups: traits related to brain ventricular volumes in particular the lateral-ventricle (*GMNC* and

*C16orf95*), Alzheimer's disease diagnosis (*BIN1* and *CR1*), and measures of blood cell/lymphocyte counts (*CR1*). The regional pTau associations of *GMNC* and *C16orf95* overlapped with ventricular volume (Figure 2). Colocalization results (Supplementary Table 5) implies the same causal variant for *C16orf95* (posterior probability=0.85), though based on the current analysis it seems the *GMNC* locus cannot be explained by the same causal variant (posterior probability=0.25). This suggests that different causal variants are underlying the *GMNC* association signals for both phenotypes, or that multiple causal variants are at play, which is currently not tested in the colocalization model (as it assumes a single causal variant).

Because of the overlap in effect of *GMNC* and *C16orf95* we hypothesized that these two loci affect the same biological pathways. We explored this hypothesis using CSF proteomics datasets of the EMIF consortium with 1,284 quantified proteins and of Knight-ADRC with 696 quantified proteins (of which 42% overlap with the EMIF-AD MBD proteins). For *GMNC* there were 279 (22%) proteins associated in the EMIF-AD MBD data (Supplementary Table 9) and 255 (36%) proteins in the Knight-ADRC data (Supplementary Table 10). *C16orf95* could only be tested in the EMIF-AD MBD data in which 73 (6%) proteins were associated (Supplementary Table 9). Only 2 proteins (*CDH9* and *DPP6*) overlapped between the 2 loci. We studied the overlap in affected pathways between the associated protein lists. For *GMNC*, consistent functional group networks between the 2 tested datasets were axon guidance and ephrin signaling (Supplementary Figure 13, Supplementary Tables 11 and 12), while for *C16orf95* (only based on the EMIF-AD MBD data) glycosaminoglycan metabolism and ECM organization were overrepresented functional groups (Supplementary Figure 14, Supplementary Table 13). There was little overlap between the loci in the pathways that emerged from the protein lists.

#### *Relation to AD associated genetic variants*

Because of the evident overlap in etiology with clinical AD dementia we explored the association of all known AD loci (excluding the *APOE* locus) with CSF A $\beta$ 42 and pTau. The results are shown in the heatmap of Figure 3 and Supplementary Tables 14 and 15. The variants could be clustered in 4 groups of AD-associated genes based on their associations with A $\beta$ 42 and pTau. The first cluster of 14 variants showed strong association with both decreased levels of A $\beta$ 42 and increased levels of pTau in CSF. A pathway enrichment analysis of the genes associated with the variants showed 19 GO terms enriched and 'amyloid' is the common denominator in the names of these terms. The second cluster contained 21 variants and included genes that have also been related to other dementia types (e.g. *GRN*, *TMEM107B*, *SNX1*, *MAPT*, *CTSB* and *CTSH*). This cluster was associated with decreased pTau levels, and no general effect on A $\beta$ 42 levels. Pathway analysis of the genes suggests

an enrichment for 4 GO terms of which the names have ‘astrocyte’ as a common denominator. The third cluster consisted of 22 genes, which were related to decreased levels of A $\beta$ 42 but not increased levels of pTau. Seven GO-terms were enriched and ‘processing’ and ‘migration’ are the words that occur most often in these terms. The last cluster of 20 genes group because they increased pTau, but did not decrease A $\beta$ 42 levels. Ten GO terms are significantly enriched in this gene cluster and ‘migration’ and ‘motility’ are most common words in these GO-terms.

## Discussion

We identified 2 loci (*CR1* and *APOE*) for A $\beta$ 42, and 4 loci (*BIN1*, *GMNC*, *C16orf95* and *APOE*) for pTau in a total of 13,116 individuals (discovery  $n = 8,074$ ; replication  $n = 5,402$  individuals). In concordance with previous studies [15, 55], both proteins showed the strongest association for *APOE*, where *APOE*  $\epsilon 4$  decreased amyloid beta levels and increased pTau levels, while *APOE*  $\epsilon 2$  had the opposite effect. We confirmed *GMNC* as a risk factor for CSF pTau levels. We identified *CR1* as a novel locus for CSF A $\beta$ 42 levels, and we observed 2 novel loci (*BIN1* and *C16orf95*) for CSF pTau levels. So other than *APOE*, no risk loci overlap is observed for A $\beta$ 42 and pTau, implying at least partly separate genetic backgrounds for both pathological hallmarks. Amyloid beta appears to be dominated by the effect of *APOE*, while pTau is influenced by multiple genetic components. Such a divergence in genetic influences is not in concordance with a genetic etiology where accumulation of Tau tangles is a direct downstream effect of amyloid plaque formation, as proposed by the amyloid cascade theory [56, 57]. Rather, it seems that these pathologies originate at least partly independent from each other, which is highly relevant biological knowledge for the development of potential AD treatments. The limited clinical efficacy of agents that aim to reduce beta-amyloid plaques might potentially be due to this [58]. In line with this implication is the observed difference in genetic clusters based on CSF protein patterns, suggesting multiple A $\beta$ 42 and pTau related biological pathways (related to amyloid, astrocyte, migration & processing, and migration and motility) to be involved in the etiology AD. The variety in subclasses of genetic contributors for AD etiology could mean that different patient groups might benefit from distinct AD treatment depending on the biological pathway that is affected.

Our *CR1* findings, are in agreement with the well-known observed association for AD risk, where rs6656401 ( $R^2 = 0.88$  with lead SNP of current study) carriers are more susceptible for AD. The similarity in these association signals is strengthened by the convincing colocalization of the *CR1* locus between our CSF pTau observation and the *CR1* locus of Kunkle et al. [35]. Functional work on the effect of *CR1* further suggests that *CR1* is involved in AD pathogenesis by regulating A $\beta$ 42 clearance, both peripherally with blood cells and in the brain itself [59]. More recent research in red

blood cells of AD patients showed deficient CR1 immunoreactivity, including CR1-mediated capture of circulating amyloid beta [60]. They observed decreased CR1 protein levels in red blood cells for *CR1* SNPs that associate with higher AD risk. The second novel locus in this study is *BIN1* for CSF pTau. Of note is the colocalization result suggesting a different causal variant for AD and pTau, which could have important implications for functional understanding of *BIN1*'s functional involvement in AD via pTau. First, more in-depth comparison with different models (e.g. multiple causal variants assumption) between these two loci should be performed before valuable functional interpretation is possible. *BIN1* has already been linked to Tau pathology in several functional studies, first shown in fruit flies where a decrease in the *BIN1* ortholog gene expression suppressed Tau-mediated neurotoxicity [61]. More recently, research in mice showed physical protein interaction between *BIN1* and Tau [62], and *BIN1* involvement in Tau-dependent hyperexcitability in AD [63]. In human subjects, *BIN1*-carriers were associated with lower memory performance, mediated by higher tau-PET levels [64]. Our observed *BIN1*-Tau association contributes valuable knowledge on this topic, by observing the same trend in a substantial larger study (89 vs 13,118 individuals) using different techniques to measure Tau pathology (PET vs. CSF). We provide in vivo confirmation that *CR1* is associated with AD via A $\beta$ 42, while *BIN1* relates to Tau pathology.

The third novel locus in this study is the region on genomic location 16q24.2 for pTau, of which the strongest associated variants are located within intronic regions of *C16orf95*. This locus has not been linked to (p)Tau pathology or AD in previous research, though it associated to lateral ventricular volume in the CHARGE study, including 23.5k healthy individuals [43]. Similarly, the 3q28-locus for pTau from our findings has also been associated to lateral ventricular volume by the CHARGE study, implying that the same genetic risk factors contribute to both phenotypes, strengthening the notion that neurodegeneration and (p)Tau pathology are highly correlated. 3q28 has been linked to (p)Tau by previous CSF studies in dementia cohorts and was identified as the *GMNC*-locus [15, 55]. In comparison to the latest GWAS of Deming et al. [15], increasing the sample size with a small 10k individuals in this study strengthens the association of this locus from  $3.07 \times 10^{-11}$  to  $1.19 \times 10^{-36}$ , thereby turning it into a well-established locus for pTau pathology (similar for Tau: Deming  $p=3.07 \times 10^{-11}$  (n=3,146); current  $p=9.65 \times 10^{-37}$  (n=12,540)). The formerly reported directions of effect of *GMNC* and *C16orf95* for ventricular volume are counterintuitive. For both loci the allele that associated with an increase in pTau pathology in our dementia cohorts associated with a smaller ventricular volume, implying less neurodegeneration. We explored if these loci work through the same biological pathways using CSF proteomics data. The consistently highlighted functional groups for the *GMNC* locus (axon guidance and ephrin signaling) were different than for the



*C16orf95* locus (extracellular matrix components), thereby implying at least partly distinct functional routes via which they influence pTau protein levels in CSF.

We furthermore identified two novel loci in the stratified analyses for A $\beta$ 42 levels: 7q11.22 for *APOE*  $\epsilon$ 4 non-carriers and 12q13.3 in individuals with abnormal amyloid levels. We were unable to test for replication of these loci in independent replication datasets, as such analyses were not performed. Neither loci have been previously linked to AD, or any other trait. The lead SNP for the locus on chromosome 7 is a common intronic variant for the lncRNA *LOC105375341*, which according to GTEx is only expressed in testis and prostate, and thereby not a promising causal gene for AD or AD-related phenotypes. The locus on chromosome 12 consists of just one rare intronic variant that was only detected in the Dutch cohort with the largest sample size (n=498). Future studies including more cohorts of large sample sizes are required to study this rare variant in more detail.

Besides *APOE* and *GMNC*, no other loci from the latest GWAS of CSF amyloid and tau [15] were replicated by this study. For A $\beta$ 42, it was not possible to test the *GLIS1*-locus as this variant was not observed in our data, which is in concordance with the gnomAD browser[65] reporting extremely low coverage and a MAF of 0.007 for rs185031519, the strongest *GLIS1* SNP in Deming et al. For the other loci that we were unable to replicate (*SERPINB1* for A $\beta$ 42; and *GLIS3*, *PCDH8*, *CTDP1* for pTau), there were no significant associations (p>0.05) despite substantial sample sizes (n>7000). These differences in findings might be due to differences in study design, for example inclusion of cohorts with other diagnoses and/or differences in analysis strategies.

The GCTA-based SNP-heritability estimates of 27% and 34% for A $\beta$ 42 and pTau, respectively, are in a similar range to the estimates calculated by Deming et al [15] (36% for A $\beta$ 42 and 25% for pTau). Notable is that the previous study estimated A $\beta$ 42 to be most heritable, while we observed the highest estimate for pTau, though the standard errors were about 10% for both studies. Our LDSC-based SNP-heritabilities show a similar trend with higher estimates for pTau. Furthermore, these LDSC-based 13% for A $\beta$ 42 and 21% for pTau protein levels are considerably higher than the 7% previously observed for the diagnosis AD. The higher heritability for the tested CSF protein levels strengthens the assumption that more objective measurable biological properties are more strongly associated to AD pathogenesis than the diagnostic classifications.

In conclusion, the current findings clearly show that studying the genetic effects of AD-related endophenotypes has the potential to reveal novel associations, and highlight important biological insights. The clear distinction in genetic findings for amyloid-beta and tau emphasizes the (partly) genetic independence of these two biological mechanisms in AD pathogenesis. Moreover, the identification of *CR1* and *BIN1*, which are the second and third strongest associated AD locus

after *APOE*, furthermore implies that by increasing sample size of genetic analysis in CSF biomarkers it will become more apparent through which biological mechanisms certain AD loci have their effect on AD pathogenesis. Even larger collaborative efforts with more homogeneous sample definitions are therefore encouraged to be undertaken to enhance our genetic understanding of AD, ultimately leading to improved biological knowledge for the development of drug treatment.

Tables

**Table 1.** Demographic information on cohorts of stage 1 discovery analysis.

| country     | Cohort                  | age  |       | gender |          | diagnoses |      |         | APOE4 carrier |          | Aβ42             |      | pTau             |      |
|-------------|-------------------------|------|-------|--------|----------|-----------|------|---------|---------------|----------|------------------|------|------------------|------|
|             |                         | mean | sd    | % male | % female | AD        | MCI  | control | other dem     | % APOE4+ | mean levels (sd) | n    | mean levels (sd) | n    |
| Belgium     | DEM                     | 78.3 | (7.3) | 40%    | 60%      | 72%       | 27%  | 1%      | 0%            | 48%      | 562.7 (250.8)    | 587  | 71.6 (35.4)      | 585  |
| Finland     | ADGEN                   | 70.2 | (8.0) | 34%    | 66%      | 89%       | 1%   | 10%     | 0%            | 73%      | 477.1 (183.2)    | 226  | 80.4 (34.8)      | 155  |
| France1     | BALTAZAR                | 77.0 | (6.7) | 45%    | 55%      | 43%       | 57%  | 0%      | 0%            | 43%      | 825.7 (358.9)    | 420  | 73.0 (34.0)      | 419  |
| France2     | MEMENTO                 | 69.2 | (8.9) | 47%    | 53%      | 0%        | 100% | 0%      | 0%            | 30%      | 1078.6 (406.7)   | 389  | 62.6 (29.8)      | 386  |
| France3     | CNRMAJ-Lille            | 66.0 | (8.7) | 47%    | 53%      | 100%      | 0%   | 0%      | 0%            | 56%      | 664.8 (205.1)    | 127  | 101.8 (53.4)     | 125  |
| Germany1    | Delcode                 | 71.7 | (5.9) | 52%    | 48%      | 13%       | 23%  | 64%     | 0%            | 39%      | 965.3 (338.2)    | 465  | 63.2 (35.1)      | 462  |
| Germany2    | KND                     | 67.3 | (8.7) | 57%    | 43%      | 18%       | 82%  | 0%      | 0%            | 49%      | 724.0 (347.9)    | 309  | 69.4 (36.8)      | 305  |
| Germany3    | TUM                     | 70.2 | (9.2) | 48%    | 52%      | 98%       | 1%   | 0%      | 1%            | 58%      | 536.8 (240.0)    | 151  | 88.8 (48.7)      | 152  |
| Germany4    | PAGES                   | 73.4 | (7.7) | 40%    | 60%      | 70%       | 30%  | 0%      | 0%            | 59%      | 528.2 (245.5)    | 136  | 90.8 (60.0)      | 137  |
| Germany5    | UHB                     | 70.3 | (7.2) | 42%    | 58%      | 69%       | 30%  | 1%      | 0%            | 68%      | 545.7 (327.8)    | 111  | 82.0 (44.2)      | 111  |
| Netherlands | ADC & Pearl ND          | 64.1 | (8.9) | 59%    | 41%      | 42%       | 10%  | 24%     | 23%           | 50%      | 842.8 (288.9)    | 2936 | 65.9 (35.9)      | 2931 |
| Spain1      | ACE                     | 72.7 | (8.2) | 43%    | 57%      | 27%       | 59%  | 8%      | 6%            | 36%      | 779.2 (314.3)    | 609  | 68.2 (35.5)      | 609  |
| Spain2      | SIGNAL & SPIN           | 70.6 | (8.0) | 43%    | 57%      | 34%       | 45%  | 19%     | 2%            | 39%      | 707.2 (368.3)    | 394  | 71.1 (41.9)      | 370  |
| Spain3      | Valdecilla              | 67.0 | (9.0) | 39%    | 61%      | 10%       | 37%  | 45%     | 8%            | 29%      | 887.5 (360.5)    | 98   | 56.8 (27.9)      | 99   |
| Sweden1     | Birth cohort & Clin. AD | 75.0 | (9.4) | 45%    | 55%      | 51%       | 0%   | 49%     | 0%            | 52%      | 533.5 (271.9)    | 856  | 68.9 (35.5)      | 694  |
| Sweden2     | Uppsala university      | 71.0 | (6.3) | 46%    | 54%      | 58%       | 37%  | 0%      | 6%            | 64%      | 489.0 (238.1)    | 260  | 77.6 (37.2)      | 259  |

Aβ42=amyloid-beta 42; pTau=phosphorylated tau; AD=Alzheimer's disease; MCI=mild cognitive impairment; other dem=other dementia; n=sample size; DEM=Antwerp prospective dementia cohort. For most cohorts, one of the two CSF levels is missing for a small number of samples. The demographics for age, gender diagnoses and APOE4 carriers status are then displayed for the largest group of samples with at least one CSF measurement. Aβ42 levels are corrected according to known drift over time for the Dutch ADC & Parel NDZ cohorts. All, except the Swedish Birth cohort & clinical AD samples, are part of EADB.

**Table 2.** Meta-analysis association results for the 3 stages.

| Protein | Locus              | rsID      | Chr      | Pos (hg38) | stage 1 |      |      | stage 2 |          |           | stage 3 |          |           |       |          |           |
|---------|--------------------|-----------|----------|------------|---------|------|------|---------|----------|-----------|---------|----------|-----------|-------|----------|-----------|
|         |                    |           |          |            | A1      | A2   | A3   | Freq A1 | n        | Z         | P       | n        | Z         | P     | n        | Z         |
| AB42    | 1q32.2 (CR1)       | rs4844610 | 1        | 207629207  | A       | C    | 0.20 | 8074    | -4.87    | 1.13E-06  | 5015    | -3.54    | 4.08E-04  | 13089 | -6.01    | 1.84E-09  |
|         | APOE               | rs429358  | 19       | 44908684   | C       | T    | 0.29 | 8074    | -36.29   | 2.00E-288 | 4488    | -25.51   | 1.57E-143 | 12562 | -41.68   | 1.00E-379 |
| pTau    | 2q14.3 (BIN1)      | rs744373  | 2        | 127137039  | G       | A    | 0.30 | 7798    | 5.39     | 6.99E-08  | 3948    | 3.03     | 2.48E-03  | 11746 | 6.15     | 7.88E-10  |
|         | 3q28 (GIMC)        | rs9877502 | 3        | 190951729  | A       | G    | 0.39 | 7798    | 9.06     | 1.28E-19  | 4742    | 8.97     | 3.00E-19  | 12540 | 12.66    | 9.65E-37  |
|         | 16q24.2 (C16orf95) | rs4843559 | 16       | 87191825   | G       | A    | 0.38 | 7798    | 6.41     | 1.49E-10  | 3985    | 3.88     | 1.03E-04  | 11783 | 7.47     | 8.03E-14  |
| APOE    | rs429358           | 19        | 44908684 | C          | T       | 0.28 | 7798 | 18.31   | 6.87E-75 | 4741      | 13.83   | 1.66E-43 | 12539     | 20.65 | 9.59E-95 |           |

rsID=ID number in SNP database; Chr=chromosome; Pos=genomic base pair position; A1=effect allele; A2=other allele; A3=allele frequency effect allele; n=sample size, P=p-value Z-statistic summarizes the magnitude and the direction of effect relative to the effect allele. For APOE stage 2 and stage 3, the statistics are reported for the most significant stage 3 variants rs420638 (G allele) for AB42 and rs769449 (A allele) for pTau, as rs429358 was not genotyped or imputed in the replication datasets.

## Figures

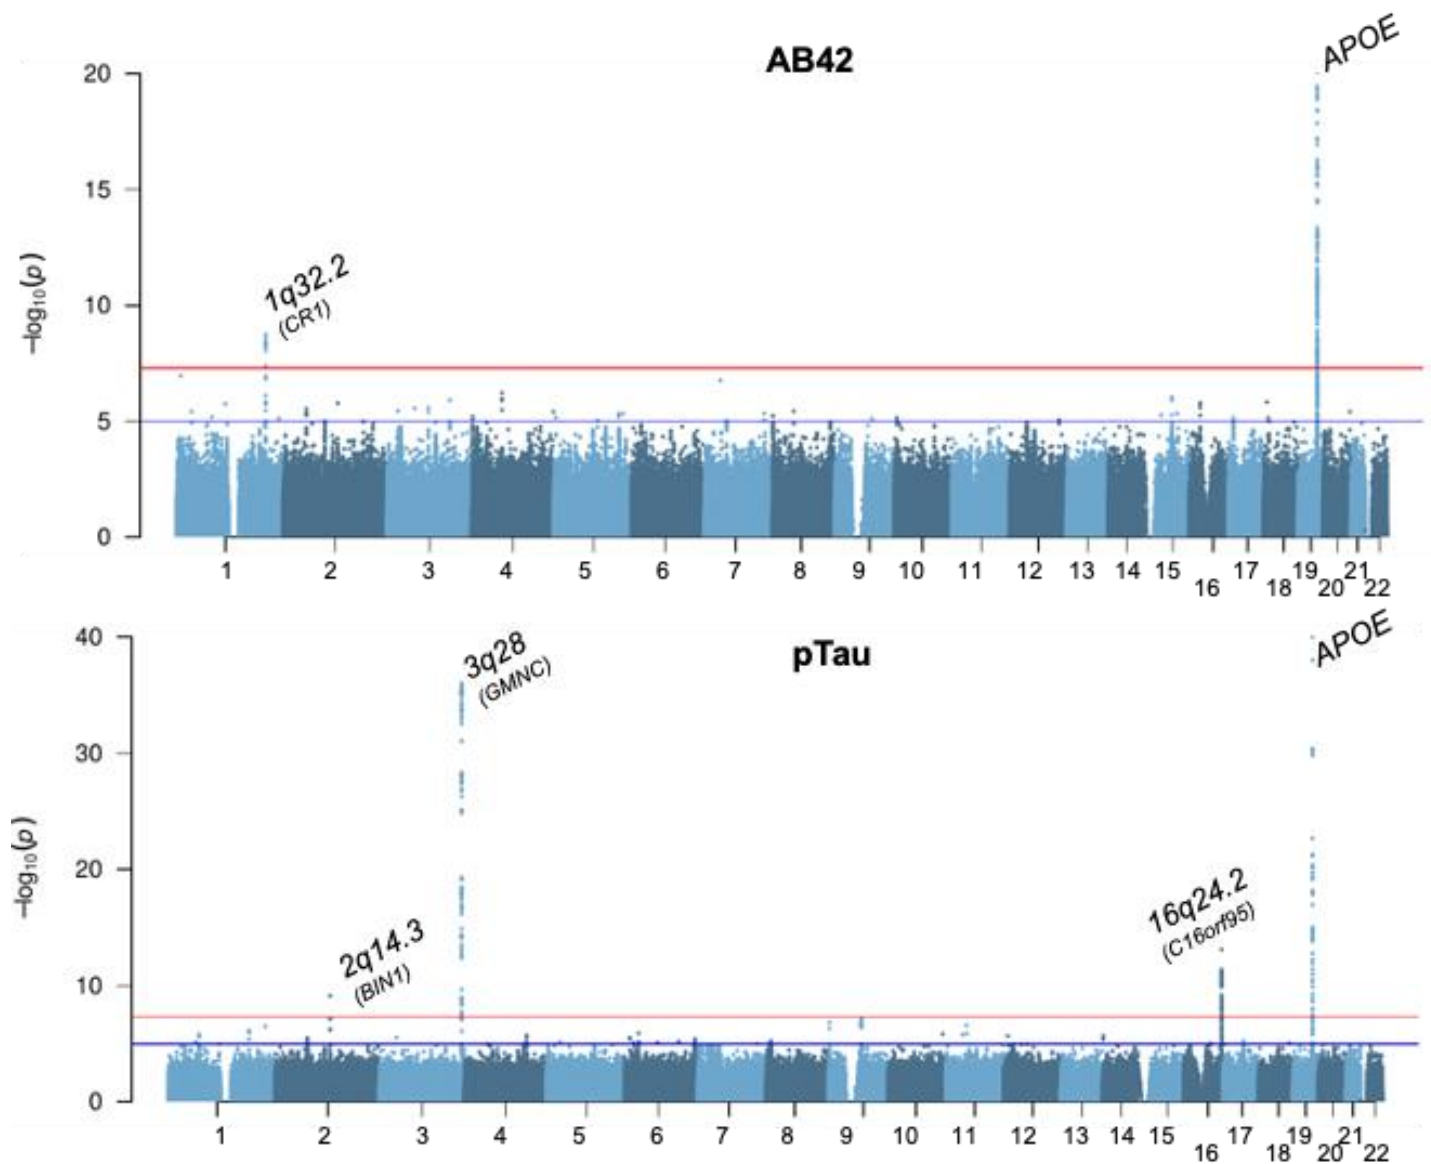

**Figure 1.** Manhattan plots of the stage 3 GWAs for A $\beta$ 42 and pTau. The y-axes are limited to visualize the non-APOE loci. The lowest p-values for APOE are  $4.07 \times 10^{-355}$  and  $3.74 \times 10^{-94}$  for A $\beta$ 42 and pTau, respectively.

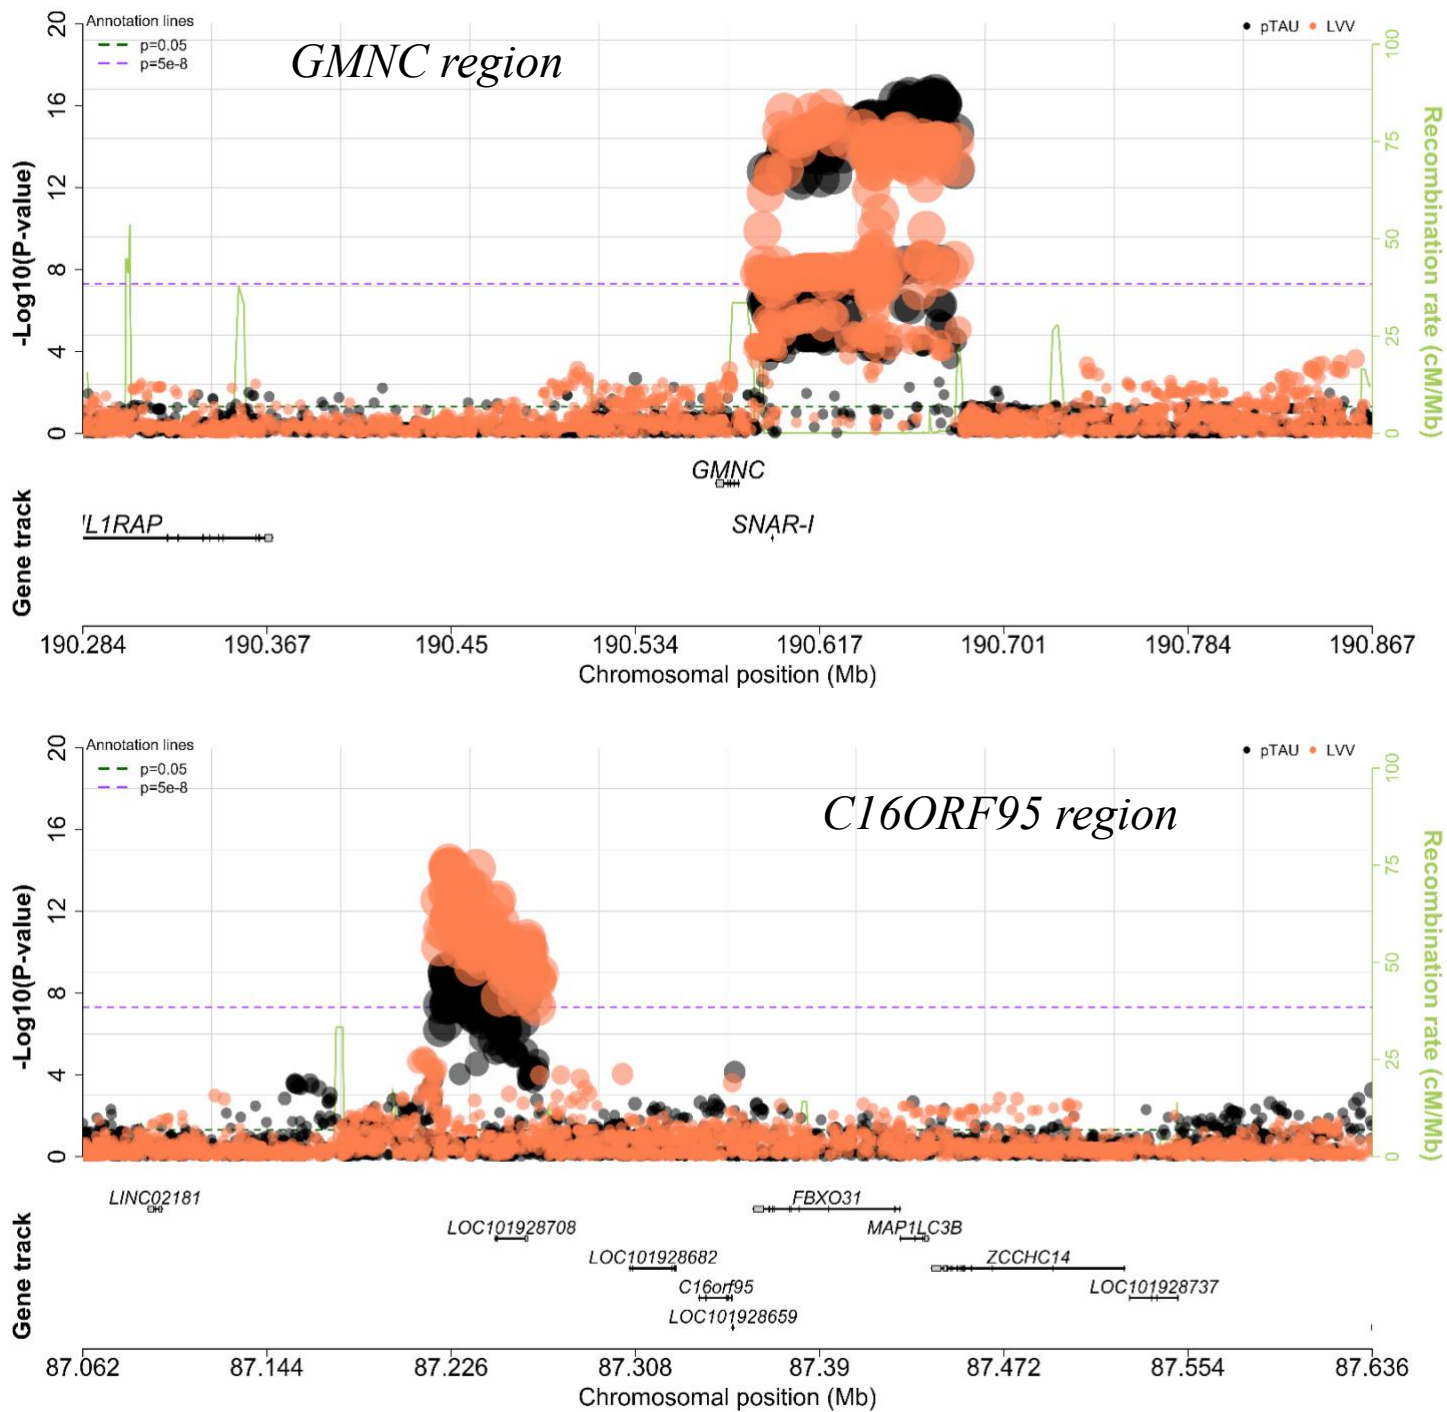

**Figure 2.** LocusZoom plots showing variant association results for *GMNC* and *C16orf95* loci. In black the pTau association signals of this study, and in orange the lateral ventricular volume (LVV) association signals observed in other studies.

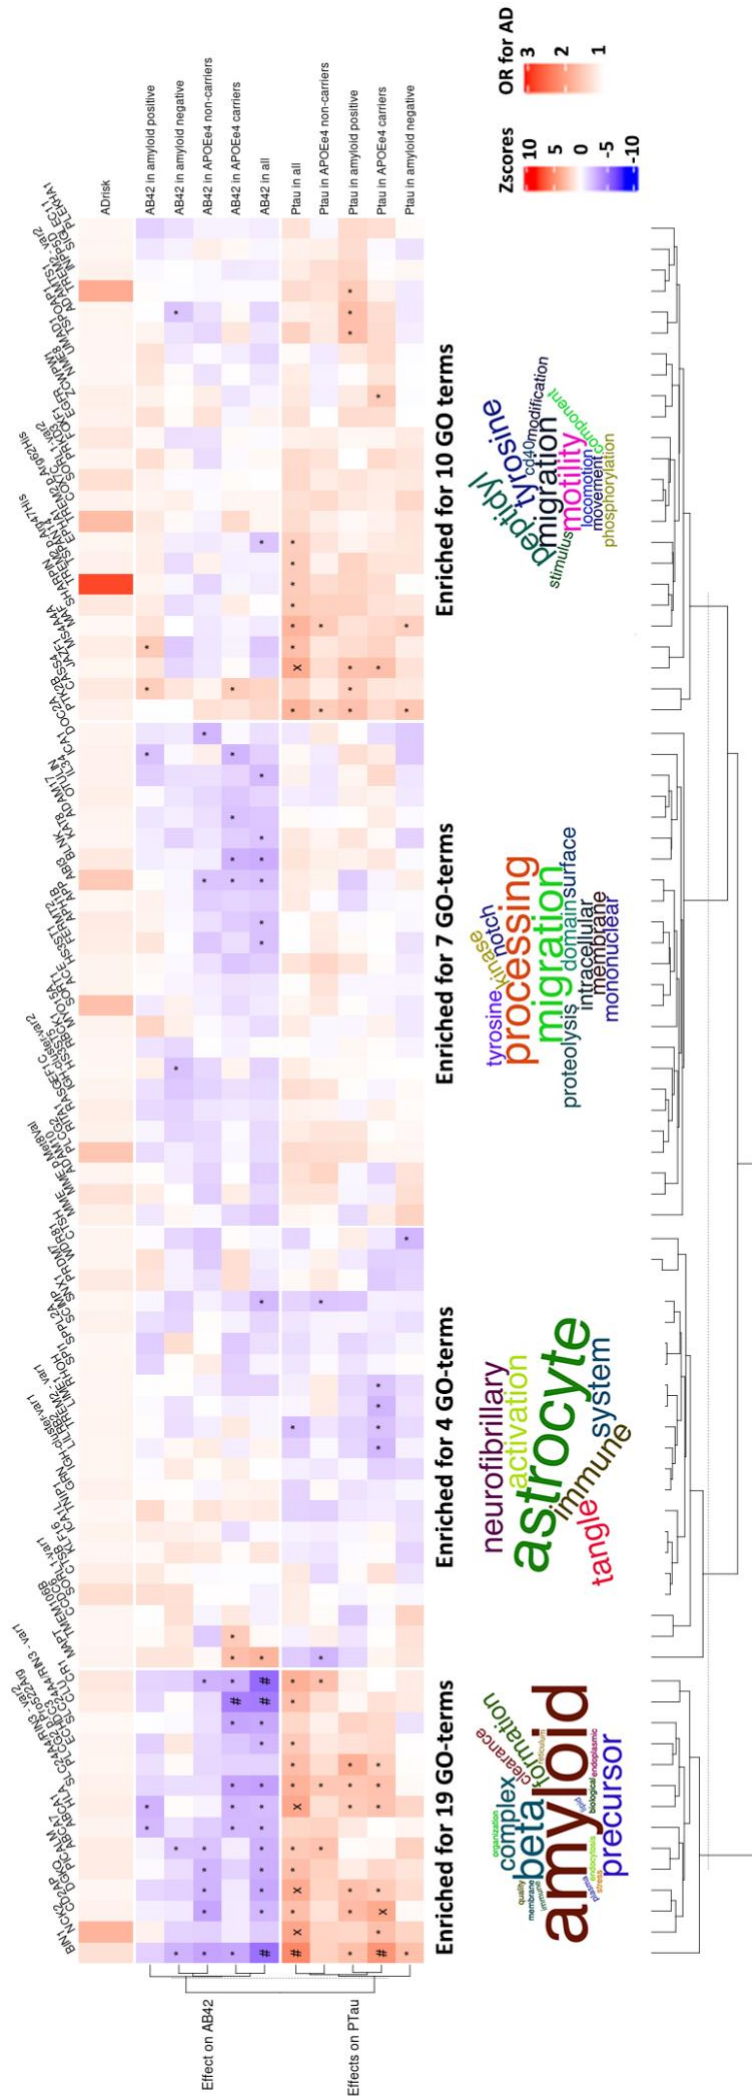

**Figure 3.** The effects of all AD associated loci. The names of the loci are named according to their linked gene names in Bellinguez et al. (2021). Hierarchical clustering was performed on the rows and columns using Euclidean distances and the method ‘average’ for clustering. Pathway enrichment analyses were performed on the four first clusters. The enrichment analyses are in Supplementary Table 9. The upper bar shows the odds ratio for AD, where alleles for variants with protective effects have been flipped to show AD-risk increasing effects for all variants. The increases in A $\beta$ 42 and pTau (positive Z-scores) are shown in red and decreases in A $\beta$ 42 and pTau (negative Z-scores) are shown in blue. \* = p-value < 0.05, X = 0.05 < p-value < 0.001, # = 0.001 < p-value < 5x10<sup>-8</sup>, \$ = p-value < 5x10<sup>-8</sup>.

## Acknowledgments

This work was supported by a grant (European Alzheimer DNA BioBank, EADB) from the EU Joint Programme, Neurodegenerative Disease Research (JPND). Amsterdam dementia Cohort (ADC): Research of the Alzheimer center Amsterdam is part of the neurodegeneration research program of Amsterdam Neuroscience. The Alzheimer Center Amsterdam is supported by Stichting Alzheimer Nederland and Stichting VUmc fonds. The clinical database structure was developed with funding from Stichting Dioraphte. Genotyping of the Dutch case-control samples was performed in the context of EADB (European Alzheimer DNA biobank) funded by the JPco-fuND FP-829-029 (ZonMW projectnumber 733051061). Part of the work described in this study was carried out in the context of the Parelnoer Institute (PSI). PSI was part of and funded by the Dutch Federation of University Medical Centers and has received initial funding from the Dutch Government (from 2007-2011). Since 2020, this work was carried out in the context of Parelnoer clinical biobanks at Health-RI (<https://www.health-ri.nl/initiatives/parelsnoer>). Part of the genotyping included in this work was funded by the JPND EADB grant (German Federal Ministry of Education and Research (BMBF) grant: 01ED1619A). Alfredo Ramirez is also supported by the German Research Foundation (DFG) grants Nr: RA 1971/6-1, RA1971/7-1, and RA 1971/8-1.

We would like to thank patients and controls who participated in this project. The Genome Research @ Fundació ACE project (GR@ACE) is supported by Grifols SA, Fundación bancaria 'La Caixa', Fundació ACE, and CIBERNED.

A.R. and M.B. receive support from the European Union/EFPIA Innovative Medicines Initiative Joint undertaking ADAPTED and MOPEAD projects (grant numbers 115975 and 115985, respectively). M.B. and A.R. are also supported by national grants PI13/02434, PI16/01861, PI17/01474, PI19/01240 and PI19/01301. Acción Estratégica en Salud is integrated into the Spanish National R + D + I Plan and funded by ISCIII (Instituto de Salud Carlos III)–Subdirección General de Evaluación and the Fondo Europeo de Desarrollo Regional (FEDER–'Una manera de hacer Europa'). The position held by I.d.R. is funded by grant. FI20/00215. PFIS Contratos Predoctorales de Formación en Investigación en Salud.

We would like to thank UCL Genomics, London, UK, for performing the genotyping analyses of the samples within the Gothenburg H70 Birth Cohort Studies and Clinical AD Sweden. The recruitment and clinical characterization of research participants at Washington University were supported by NIH P30AG066444, and P01AG003991. This work was supported by access to equipment made possible by the Hope Center for Neurological Disorders, the Neurogenomics and Informatics Center (NGI: <https://neurogenomics.wustl.edu/>) and the Departments of Neurology and Psychiatry at Washington University School of Medicine. Research at the Belgian EADB site is funded in part by the Alzheimer Research Foundation (SAO-FRA), The Research Foundation Flanders (FWO), and the University of Antwerp Research Fund. FK is supported by a BOF DOCPRO fellowship of the University of Antwerp Research Fund. The work of Valdecilla was supported by grants from the Instituto de Salud Carlos III (Fondo de Investigación Sanitario, PI08/0139, PI12/02288, PI16/01652, and PI20/01011), the JPND (DEMTEST PI11/03028), the CIBERNED, and the Siemens Healthineers. We thank the Valdecilla Biobank (PT17/0015/0019), integrated into the Spanish Biobank Network, for their support and collaboration in sample collection and management. Our heartfelt thanks to the participants of the Valdecilla Cohort for their generosity. The work of ADGEN was supported by EU Joint Programme - Neurodegenerative Disease Research (301220) and the Academy of Finland (338182). The DELCODE study (Study-ID:BN012) was supported and conducted by the German Center for Neurodegenerative Diseases (DZNE). The data samples were provided by the DELCODE study group. Details and participating sites can be found at [www.dzne.de/en/research/studies/clinical-studies/delcode](http://www.dzne.de/en/research/studies/clinical-studies/delcode). The German Dementia Competence Network (KND) is funded by the German Federal Ministry of Education and Research (BMBF) grants Number: 01G10102, 01GI0420, 01GI0422, 01GI0423, 01GI0429, 01GI0431, 01GI0433, 04GI0434, 01GI0711.

WF, SvdL, HHolstege, CT and PhS are recipients of ABOARD, which is a public-private partnership receiving funding from ZonMW (#73305095007) and Health~Holland, Topsector Life Sciences & Health (PPP-allowance; #LSHM20106). More than 30 partners participate in ABOARD ([www.aboard-project.nl](http://www.aboard-project.nl)). ABOARD also receives funding from de Hersenstichting, Edwin Bouw Fonds and Gieskes-Strijbisfonds. IEJ was partially supported by NWO Gravitation program BRAINSCAPES: A Roadmap from Neurogenetics to Neurobiology (NWO: 024.004.012). AZ was supported by the Swedish Alzheimer Foundation (AF-939988, AF-930582, AF-646061, AF-741361), and the Dementia Foundation (2020-04-13, 2021-04-17). ISk was supported by the Swedish state under the agreement between the Swedish government and the county councils, the ALF-agreement (ALF 716681), the Swedish Research Council (no 11267, 825-2012-5041, 2013-8717, 2015-02830, 2017-00639, 2019-01096), Swedish Research Council for Health, Working Life and Welfare (no 2001-2646, 2001-2835, 2001-2849, 2003-0234, 2004-0150, 2005-0762, 2006-0020, 2008-1229, 2008-1210, 2012-1138, 2004-0145, 2006-0596, 2008-1111, 2010-0870, 2013-1202, 2013-2300, 2013-2496), Swedish Brain Power, Hjärnfonden, Sweden (FO2016-0214, FO2018-0214, FO2019-0163), the Alzheimer's Association Zenith Award (ZEN-01-3151), the Alzheimer's Association Stephanie B. Overstreet Scholars (IIRG-00-2159), the Alzheimer's Association (IIRG-03-6168, IIRG-09-131338) and the Bank of Sweden Tercentenary Foundation. SK was supported by the Swedish state under the agreement between the Swedish government and the county councils, the ALF-agreement (ALFGBG-81392, ALF GBG-771071), the Swedish Alzheimer Foundation (AF-842471, AF-737641, AF-939825), and the Swedish Research Council (2019-02075). MW was supported by the Swedish Research Council 2016-01590. HZ is a Wallenberg Scholar supported by grants from the Swedish Research Council (2018-02532), the European Research Council (681712), Swedish State Support for Clinical Research (ALFGBG-720931), the Alzheimer Drug Discovery Foundation (ADDF), USA (201809-2016862), the European Union's Horizon 2020 research and innovation programme under the Marie Skłodowska-Curie grant agreement No 860197 (MIRIADE), and the UK Dementia Research Institute at UCL. KB was supported by the Swedish Research Council (#2017-00915), the Alzheimer Drug Discovery Foundation (ADDF), USA (#RDAPB-201809-2016615), the Swedish Alzheimer Foundation (#AF-742881), Hjärnfonden, Sweden (#FO2017-0243), the Swedish state under the agreement between the Swedish government and the County Councils, the ALF-agreement (#ALFGBG-715986), the European Union Joint Program for Neurodegenerative Disorders (JPND2019-466-236), the National Institute of Health (NIH), USA, (grant #1R01AG068398-01), and the Alzheimer's Association 2021 Zenith Award (ZEN-21-848495). CC receives support from the National Institutes of Health (R01AG044546, R01AG064877, RF1AG053303, R01AG058501, U01AG058922, RF1AG058501, R01AG064614), and the Chuck Zuckerberg Initiative (CZI).

### **Competing Interests**

Research programs of Wiesje van der Flier have been funded by ZonMW, NWO, EU-FP7, EU-JPND, Alzheimer Nederland, CardioVascular Onderzoek Nederland, Health~Holland, Topsector Life Sciences & Health, stichting Dioraphte, Gieskes-Strijbis fonds, stichting Equilibrio, Pasman stichting, stichting Alzheimer & Neuropsychiatrie Foundation, Biogen MA Inc, Boehringer Ingelheim, Life-MI, AVID, Roche BV, Fujifilm, Combinostics. WF holds the Pasman chair. WF is recipient of ABOARD, which is a public-private partnership receiving funding from ZonMW (#73305095007) and Health~Holland, Topsector Life Sciences & Health (PPP-allowance; #LSHM20106). WF has performed contract research for Biogen MA Inc, and Boehringer Ingelheim. WF has been an invited speaker at Boehringer Ingelheim, Biogen MA Inc, Danone, Eisai, WebMD Neurology (Medscape), Springer Healthcare. WF is consultant to Oxford Health Policy Forum CIC, Roche, and Biogen MA Inc. WF participated in advisory boards of Biogen MA Inc and Roche. All funding is paid to her institution. WF was associate editor of Alzheimer, Research & Therapy in 2020/2021. WF is associate editor at Brain.



CC receives research support from: Biogen, Eisai, Alector and Parabon. The funders of the study had no role in the collection, analysis, or interpretation of data; in the writing of the report; or in the decision to submit the paper for publication. CC is a member of the advisory board of Vivid genetics, Halia Therapeutics and ADx Healthcare.

HZ has served at scientific advisory boards for Denali, Roche Diagnostics, Wave, Samumed, Siemens Healthineers, Pinteon Therapeutics and CogRx, has given lectures in symposia sponsored by Fujirebio, Alzecure and Biogen, and is a co-founder of Brain Biomarker Solutions in Gothenburg AB (BBS), which is a part of the GU Ventures Incubator Program (outside submitted work).

KBlennow has served as a consultant, at advisory boards, or at data monitoring committees for Abcam, Axon, Biogen, JOMDD/Shimadzu, Julius Clinical, Lilly, MagQu, Novartis, Roche Diagnostics, and Siemens Healthineers, and is a co-founder of Brain Biomarker Solutions in Gothenburg AB (BBS), which is a part of the GU Ventures Incubator Program.

OAA is a consultant to HealthLytix, and received speaker's honorarium from Lundbeck and Sunovion.

SE has served at scientific advisory boards for Biogen, Danone, Eisai, icometrix, Pfizer, Novartis, Nutricia, Roche and has received unrestricted research grants from ADx Neurosciences and Janssen Pharmaceutica.

CC receives research support from: Biogen, Eisai, Alector, GSK and Parabon. The funders of the study had no role in the collection, analysis, or interpretation of data; in the writing of the report; or in the decision to submit the paper for publication. CC is a member of the advisory board of Vivid genetics, Halia Therapeutics and ADx Healthcare.

HHampel is an employee of Eisai Inc. and serves as Senior Associate Editor for the Journal *Alzheimer's & Dementia*; during the past three years he had received lecture fees from Servier, Biogen and Roche, research grants from Pfizer, Avid, and MSD Avenir (paid to the institution), travel funding from Eisai, Functional Neuromodulation, Axovant, Eli Lilly and company, Takeda and Zinfandel, GE-Healthcare and Oryzon Genomics, consultancy fees from Qynapse, Jung Diagnostics, Cytox Ltd., Axovant, Anavex, Takeda and Zinfandel, GE Healthcare, Oryzon Genomics, and Functional Neuromodulation, and participated in scientific advisory boards of Functional Neuromodulation, Axovant, Eisai, Eli Lilly and company, Cytox Ltd., GE Healthcare, Takeda and Zinfandel, Oryzon Genomics and Roche Diagnostics.

DA participated in advisory boards from Fujirebio-Europe and Roche Diagnostics and received speaker honoraria from Fujirebio-Europe, Roche Diagnostics, Nutricia, Krka Farmacéutica S.L., Zambon S.A.U. and Esteve Pharmaceuticals S.A.

OG reports consulting fees from Eli Lilly, grants to his institution from Actelion, and prescreening activities for Julius Clinical/Toyama.

ABK has been a PI in the drug trials Roche BN29553, Boehringer-Ingelheim 1346.0023 and is PI in Novo Nordisk NN6535-4730.

AL has received personal fees for advisory board services and/or speaker honoraria from Fujirebio-Europe, Roche Diagnostics, Nutricia, Krka Farmacéutica SL, Biogen and Zambon.

PSJ has received personal fees for advisory board from Roche Diagnostics and Zambon.

GS participated in one advisory board meeting from Biogen.

MI is a paid consultant to BioArctic AB. KS is editor at *Acta Neuropathologica* and associate editor at *Alzheimer's Research & Therapy*.

HZ has served at scientific advisory boards for Denali, Roche Diagnostics, Wave, Samumed, Siemens Healthineers, Pinteon Therapeutics and CogRx, has given lectures in symposia sponsored by Fujirebio, Alzecure and Biogen, and is a co-founder of Brain Biomarker Solutions in Gothenburg AB (BBS), which is a part of the GU Ventures Incubator Program (outside submitted work).

All other authors declare no financial interests or potential conflicts of interest.

## References

1. Goate, A., et al., *Segregation of a missense mutation in the amyloid precursor protein gene with familial Alzheimer's disease*. Nature, 1991. **349**(6311): p. 704-6.
2. Sherrington, R., et al., *Cloning of a gene bearing missense mutations in early-onset familial Alzheimer's disease*. Nature, 1995. **375**(6534): p. 754-60.
3. Sherrington, R., et al., *Alzheimer's disease associated with mutations in presenilin 2 is rare and variably penetrant*. Hum Mol Genet, 1996. **5**(7): p. 985-8.
4. Karran, E., M. Mercken, and B. De Strooper, *The amyloid cascade hypothesis for Alzheimer's disease: an appraisal for the development of therapeutics*. Nat Rev Drug Discov, 2011. **10**(9): p. 698-712.
5. Jansen, I.E., et al., *Genome-wide meta-analysis identifies new loci and functional pathways influencing Alzheimer's disease risk*. Nat Genet, 2019. **51**(3): p. 404-413.
6. Sims, R., et al., *Rare coding variants in PLCG2, ABI3, and TREM2 implicate microglial-mediated innate immunity in Alzheimer's disease*. Nat Genet, 2017. **49**(9): p. 1373-1384.
7. Yeh, F.L., et al., *TREM2 Binds to Apolipoproteins, Including APOE and CLU/APOJ, and Thereby Facilitates Uptake of Amyloid-Beta by Microglia*. Neuron, 2016. **91**(2): p. 328-40.
8. Wyss-Coray, T., et al., *Prominent neurodegeneration and increased plaque formation in complement-inhibited Alzheimer's mice*. Proc Natl Acad Sci U S A, 2002. **99**(16): p. 10837-42.
9. El Khoury, J., et al., *Ccr2 deficiency impairs microglial accumulation and accelerates progression of Alzheimer-like disease*. Nat Med, 2007. **13**(4): p. 432-8.
10. Bellenguez, C., et al., *New insights on the genetic etiology of Alzheimer's and related dementia*. medRxiv, 2020: p. 2020.10.01.20200659.
11. Wightman, D.P., et al., *Largest GWAS (N=1,126,563) of Alzheimer's Disease Implicates Microglia and Immune Cells*. medRxiv, 2020: p. 2020.11.20.20235275.
12. Gottesman, II and T.D. Gould, *The endophenotype concept in psychiatry: etymology and strategic intentions*. Am J Psychiatry, 2003. **160**(4): p. 636-45.
13. Sunderland, T., et al., *Decreased beta-amyloid1-42 and increased tau levels in cerebrospinal fluid of patients with Alzheimer disease*. Jama, 2003. **289**(16): p. 2094-103.
14. Olsson, B., et al., *CSF and blood biomarkers for the diagnosis of Alzheimer's disease: a systematic review and meta-analysis*. Lancet Neurol, 2016. **15**(7): p. 673-684.
15. Deming, Y., et al., *Genome-wide association study identifies four novel loci associated with Alzheimer's endophenotypes and disease modifiers*. Acta Neuropathol, 2017. **133**(5): p. 839-856.
16. Alcolea, D., et al., *Amyloid precursor protein metabolism and inflammation markers in preclinical Alzheimer disease*. Neurology, 2015. **85**(7): p. 626-33.
17. Alcolea, D., et al., *Agreement of amyloid PET and CSF biomarkers for Alzheimer's disease on Lumipulse*. Ann Clin Transl Neurol, 2019. **6**(9): p. 1815-1824.
18. Kaipainen, A., et al., *Cerebrospinal Fluid and MRI Biomarkers in Neurodegenerative Diseases: A Retrospective Memory Clinic-Based Study*. J Alzheimers Dis, 2020. **75**(3): p. 751-765.
19. Almdahl, I.S., et al., *Cerebrospinal Fluid Levels of Amyloid Beta 1-43 Mirror 1-42 in Relation to Imaging Biomarkers of Alzheimer's Disease*. Front Aging Neurosci, 2017. **9**: p. 9.

20. Fladby, T., et al., *Detecting At-Risk Alzheimer's Disease Cases*. J Alzheimers Dis, 2017. **60**(1): p. 97-105.
21. Tijms, B.M., et al., *Unbiased Approach to Counteract Upward Drift in Cerebrospinal Fluid Amyloid- $\beta$  1-42 Analysis Results*. Clin Chem, 2018. **64**(3): p. 576-585.
22. Mulder, C., et al., *Amyloid-beta(1-42), total tau, and phosphorylated tau as cerebrospinal fluid biomarkers for the diagnosis of Alzheimer disease*. Clin Chem, 2010. **56**(2): p. 248-53.
23. Zettergren, A., et al., *Association of IL1RAP-related genetic variation with cerebrospinal fluid concentration of Alzheimer-associated tau protein*. Sci Rep, 2019. **9**(1): p. 2460.
24. Somers, C., et al., *A Decade of Cerebrospinal Fluid Biomarkers for Alzheimer's Disease in Belgium*. J Alzheimers Dis, 2016. **54**(1): p. 383-95.
25. Jessen, F., et al., *Design and first baseline data of the DZNE multicenter observational study on predementia Alzheimer's disease (DELCODE)*. Alzheimer's Research & Therapy, 2018. **10**(1): p. 15.
26. Kornhuber, J., et al., *Early and differential diagnosis of dementia and mild cognitive impairment: design and cohort baseline characteristics of the German Dementia Competence Network*. Dement Geriatr Cogn Disord, 2009. **27**(5): p. 404-17.
27. Ramirez, A., et al., *SUCLG2 identified as both a determinant of CSF A $\beta$ 1-42 levels and an attenuator of cognitive decline in Alzheimer's disease*. Hum Mol Genet, 2014. **23**(24): p. 6644-58.
28. Grimmer, T., et al., *Beta amyloid in Alzheimer's disease: increased deposition in brain is reflected in reduced concentration in cerebrospinal fluid*. Biol Psychiatry, 2009. **65**(11): p. 927-34.
29. Geijselaers, S.L.C., et al., *Association of Cerebrospinal Fluid (CSF) Insulin with Cognitive Performance and CSF Biomarkers of Alzheimer's Disease*. J Alzheimers Dis, 2018. **61**(1): p. 309-320.
30. Taliun, D., et al., *Sequencing of 53,831 diverse genomes from the NHLBI TOPMed Program*. bioRxiv 563866. preprint at <https://doi.org/10.1101/563866>, 2019.
31. Das, S., et al., *Next-generation genotype imputation service and methods*. Nat Genet, 2016. **48**(10): p. 1284-1287.
32. de Rojas, I., et al., *Common variants in Alzheimer's disease and risk stratification by polygenic risk scores*. Nature Communications, 2021. **12**(1): p. 3417.
33. Najar, J., et al., *Polygenic risk scores for Alzheimer's disease are related to dementia risk in APOE  $\epsilon$ 4 negatives*. Alzheimer's & Dementia: Diagnosis, Assessment & Disease Monitoring, 2021. **13**(1): p. e12142.
34. Chang, C.C., et al., *Second-generation PLINK: rising to the challenge of larger and richer datasets*. GigaScience, 2015. **4**(1).
35. Kunkle, B.W., et al., *Genetic meta-analysis of diagnosed Alzheimer's disease identifies new risk loci and implicates A $\beta$ , tau, immunity and lipid processing*. Nat Genet, 2019. **51**(3): p. 414-430.
36. Bulik-Sullivan, B.K., et al., *LD Score regression distinguishes confounding from polygenicity in genome-wide association studies*. Nature Genetics, 2015. **47**(3): p. 291-295.
37. Yang, J., et al., *GCTA: a tool for genome-wide complex trait analysis*. Am J Hum Genet, 2011. **88**(1): p. 76-82.

38. Willer, C.J., Y. Li, and G.R. Abecasis, *METAL: fast and efficient meta-analysis of genomewide association scans*. *Bioinformatics*, 2010. **26**(17): p. 2190-1.
39. Giambartolomei, C., et al., *Bayesian test for colocalisation between pairs of genetic association studies using summary statistics*. *PLoS Genet*, 2014. **10**(5): p. e1004383.
40. Wallace, C., *Eliciting priors and relaxing the single causal variant assumption in colocalisation analyses*. *PLoS Genet*, 2020. **16**(4): p. e1008720.
41. Kerimov, N., et al., *A compendium of uniformly processed human gene expression and splicing quantitative trait loci*. *Nature Genetics*, 2021. **53**(9): p. 1290-1299.
42. Young, A.M.H., et al., *A map of transcriptional heterogeneity and regulatory variation in human microglia*. *Nat Genet*, 2021. **53**(6): p. 861-868.
43. Vojinovic, D., et al., *Genome-wide association study of 23,500 individuals identifies 7 loci associated with brain ventricular volume*. *Nature Communications*, 2018. **9**(1): p. 3945.
44. de Leeuw, C.A., et al., *MAGMA: generalized gene-set analysis of GWAS data*. *PLoS Comput Biol*, 2015. **11**(4): p. e1004219.
45. Watanabe, K., et al., *Functional mapping and annotation of genetic associations with FUMA*. *Nature Communications*, 2017. **8**(1): p. 1826.
46. Elsworth, B., et al., *The MRC IEU OpenGWAS data infrastructure*. *bioRxiv*, 2020: p. 2020.08.10.244293.
47. Hemani, G., et al., *The MR-Base platform supports systematic causal inference across the human phenome*. *Elife*, 2018. **7**.
48. Tijms, B.M., et al., *Pathophysiological subtypes of Alzheimer's disease based on cerebrospinal fluid proteomics*. *Brain*, 2020. **143**(12): p. 3776-3792.
49. Yang, C., et al., *Genomic atlas of the proteome from brain, CSF and plasma prioritizes proteins implicated in neurological disorders*. *Nature Neuroscience*, 2021. **24**(9): p. 1302-1312.
50. Merico, D., et al., *Enrichment map: a network-based method for gene-set enrichment visualization and interpretation*. *PLoS One*, 2010. **5**(11): p. e13984.
51. Ashburner, M., et al., *Gene ontology: tool for the unification of biology. The Gene Ontology Consortium*. *Nat Genet*, 2000. **25**(1): p. 25-9.
52. *The Gene Ontology resource: enriching a GOld mine*. *Nucleic Acids Res*, 2021. **49**(D1): p. D325-d334.
53. Kolberg, L., et al., *gprofiler2 -- an R package for gene list functional enrichment analysis and namespace conversion toolset g:Profiler*. *F1000Res*, 2020. **9**.
54. Zheng, J., et al., *LD Hub: a centralized database and web interface to perform LD score regression that maximizes the potential of summary level GWAS data for SNP heritability and genetic correlation analysis*. *Bioinformatics*, 2017. **33**(2): p. 272-279.
55. Cruchaga, C., et al., *GWAS of cerebrospinal fluid tau levels identifies risk variants for Alzheimer's disease*. *Neuron*, 2013. **78**(2): p. 256-68.
56. Hardy, J.A. and G.A. Higgins, *Alzheimer's disease: the amyloid cascade hypothesis*. *Science*, 1992. **256**(5054): p. 184-5.
57. He, Z., et al., *Amyloid- $\beta$  plaques enhance Alzheimer's brain tau-seeded pathologies by facilitating neuritic plaque tau aggregation*. *Nature Medicine*, 2018. **24**(1): p. 29-38.
58. Yiannopoulou, K.G., et al., *Reasons for Failed Trials of Disease-Modifying Treatments for Alzheimer Disease and Their Contribution in Recent Research*. *Biomedicine*, 2019. **7**(4).

59. Zhu, X.-C., et al., *CR1 in Alzheimer's Disease*. *Molecular Neurobiology*, 2015. **51**(2): p. 753-765.
60. Johansson, J.U., et al., *Peripheral complement interactions with amyloid  $\beta$  peptide in Alzheimer's disease: Polymorphisms, structure, and function of complement receptor 1*. *Alzheimers Dement*, 2018. **14**(11): p. 1438-1449.
61. Chapuis, J., et al., *Increased expression of BIN1 mediates Alzheimer genetic risk by modulating tau pathology*. *Mol Psychiatry*, 2013. **18**(11): p. 1225-34.
62. Sartori, M., et al., *BIN1 recovers tauopathy-induced long-term memory deficits in mice and interacts with Tau through Thr(348) phosphorylation*. *Acta Neuropathol*, 2019. **138**(4): p. 631-652.
63. Voskobiynyk, Y., et al., *Alzheimer's disease risk gene BIN1 induces Tau-dependent network hyperexcitability*. *Elife*, 2020. **9**.
64. Franzmeier, N., et al., *The BIN1 rs744373 SNP is associated with increased tau-PET levels and impaired memory*. *Nature Communications*, 2019. **10**(1): p. 1766.
65. Karczewski, K.J., et al., *The mutational constraint spectrum quantified from variation in 141,456 humans*. *Nature*, 2020. **581**(7809): p. 434-443.
